# Supplementary material for: Synthesis of 4′-Substituted-2′-Deoxy-2′-α-Fluoro Nucleoside Analogs as Potential Antiviral Agents
Source: PubMed Central journal article supplement (PMC7143966; doi:10.3390/molecules25061258), 2020-03-11
Supplement: molecules-25-01258-s001.pdf [file molecules-25-01258-s001.pdf]

# Supporting Information

## Synthesis of 4'-Substituted-2'-Deoxy-2'- $\alpha$ -Fluoro Nucleoside Analogues as Potential Antiviral Agents

Mahesh Kasthuri, Chengwei Li, Kiran Verma, Olivia Ollinger Russell, Lyndsey Dickson,  
Louise McCormick, Leda Bassit, Franck Amblard, Raymond F. Schinazi\*

<sup>1</sup> Center for AIDS Research, Laboratory of Biochemical Pharmacology, Department of  
Pediatrics, Emory University School of Medicine, 1760 Haygood Drive, Atlanta, GA 30322,  
USA;

\* Correspondence: rschina@emory.edu

### Table of Contents:

- |                                                                                                                                                          |        |
|----------------------------------------------------------------------------------------------------------------------------------------------------------|--------|
| 1. <sup>1</sup> H, <sup>13</sup> C and <sup>19</sup> F-NMR spectra for compounds <b>11</b> , <b>14</b> , <b>17</b> , <b>20</b> , <b>25</b> and <b>26</b> | S2-S19 |
| 2. Crystallographic data for compound <b>17</b>                                                                                                          | S20-25 |

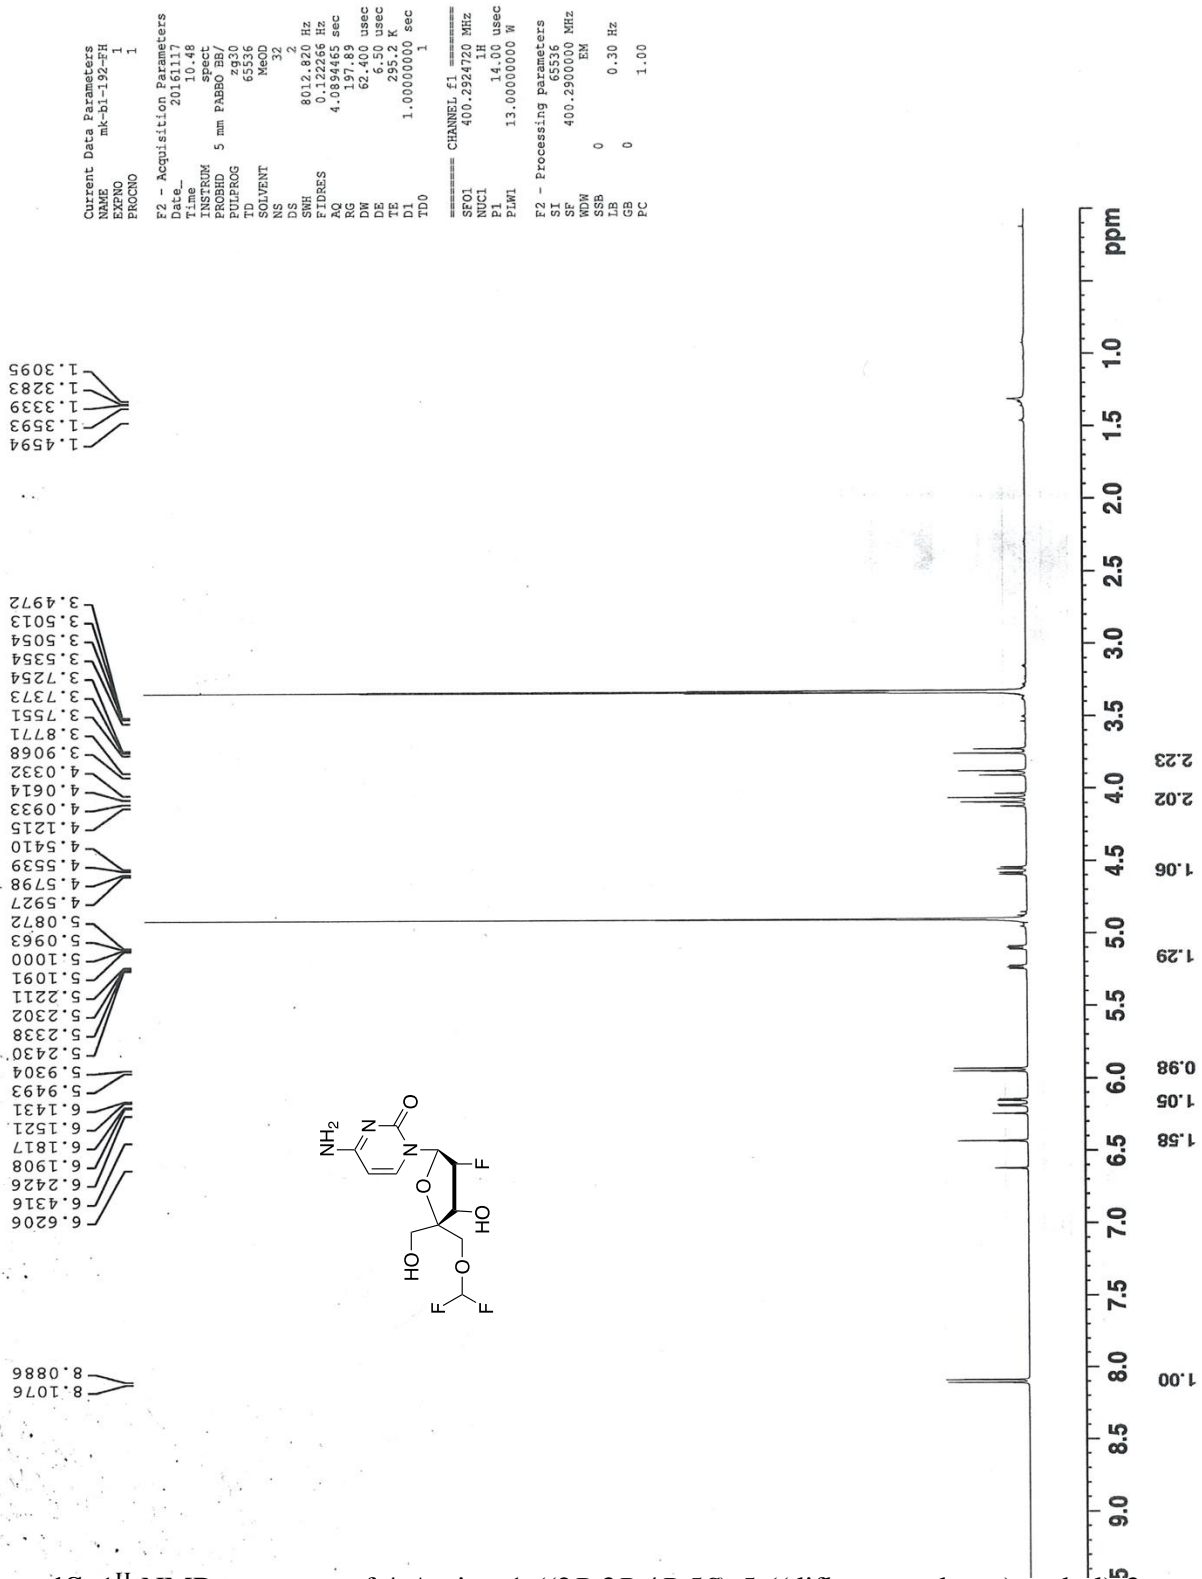

**Figure 1S.**  $^1\text{H}$ -NMR spectrum of 4-Amino-1-((2R,3R,4R,5S)-5-((difluoromethoxy)methyl)-3-fluoro-4-hydroxy-5-(hydroxymethyl) tetrahydrofuran-2-yl)pyrimidin-2(1H)-one (**11**)

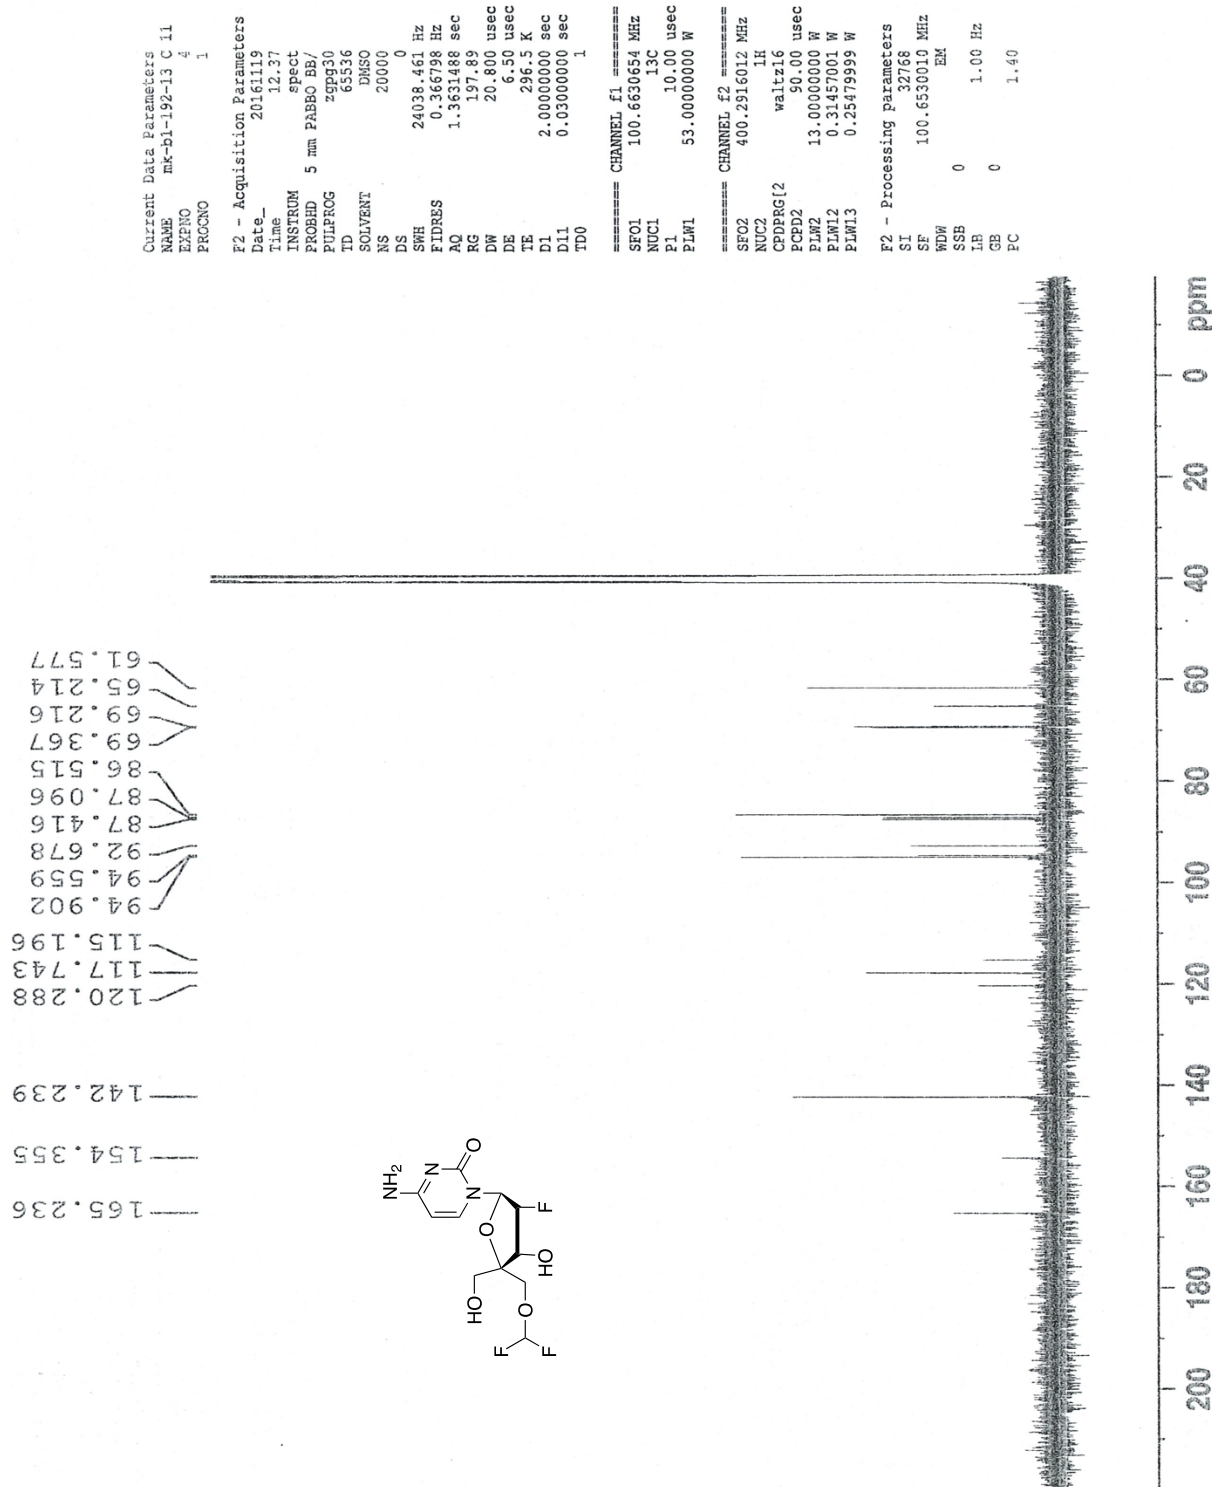

**Figure 2S.**  $^{13}\text{C}$ -NMR spectrum of 4-Amino-1-((2R,3R,4R,5S)-5-((difluoromethoxy)methyl)-3-fluoro-4-hydroxy-5-(hydroxymethyl) tetrahydrofuran-2-yl)pyrimidin-2(1H)-one (**11**)

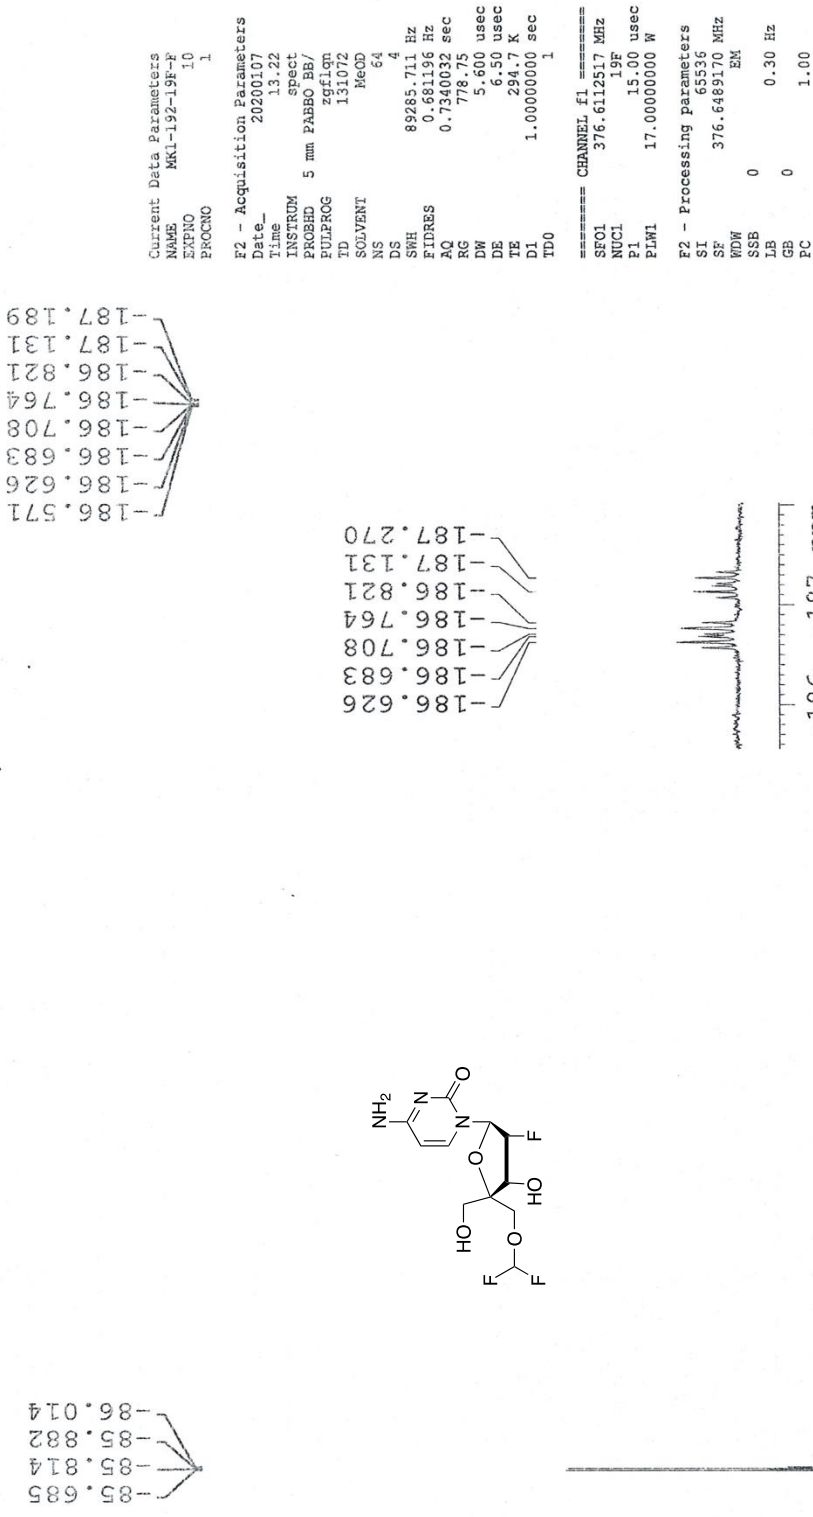

**Figure 4S.**  $^{19}\text{F}$ -NMR spectrum of 4-Amino-1-((2R,3R,4R,5S)-5-((difluoromethoxy)methyl)-3-fluoro-4-hydroxy-5-(hydroxymethyl) tetrahydrofuran-2-yl)pyrimidin-2(1H)-one (**11**)

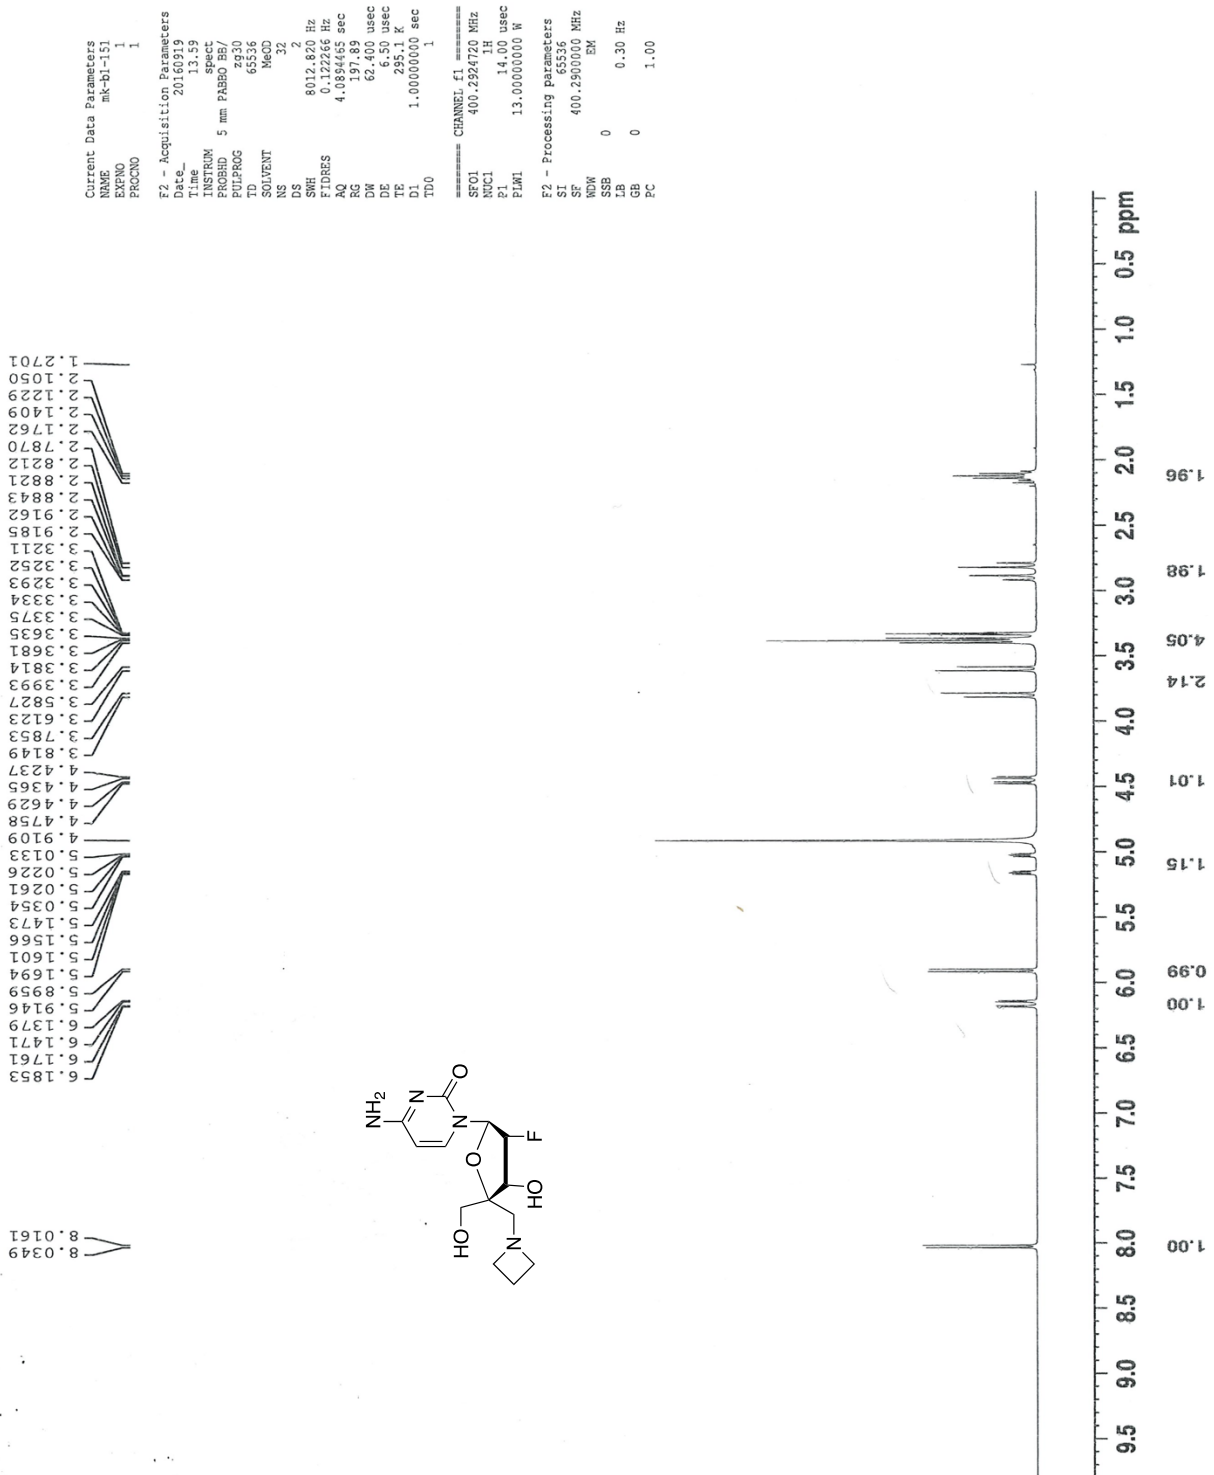

**Figure 4S.**  $^1\text{H-NMR}$  spectrum of 4-Amino-1-((2R,3R,4R,5R)-5-(azetidin-1-ylmethyl)-3-fluoro-4-hydroxy-5-(hydroxymethyl) tetrahydrofuran-2-yl)pyrimidin-2(1H)-one (**14**)

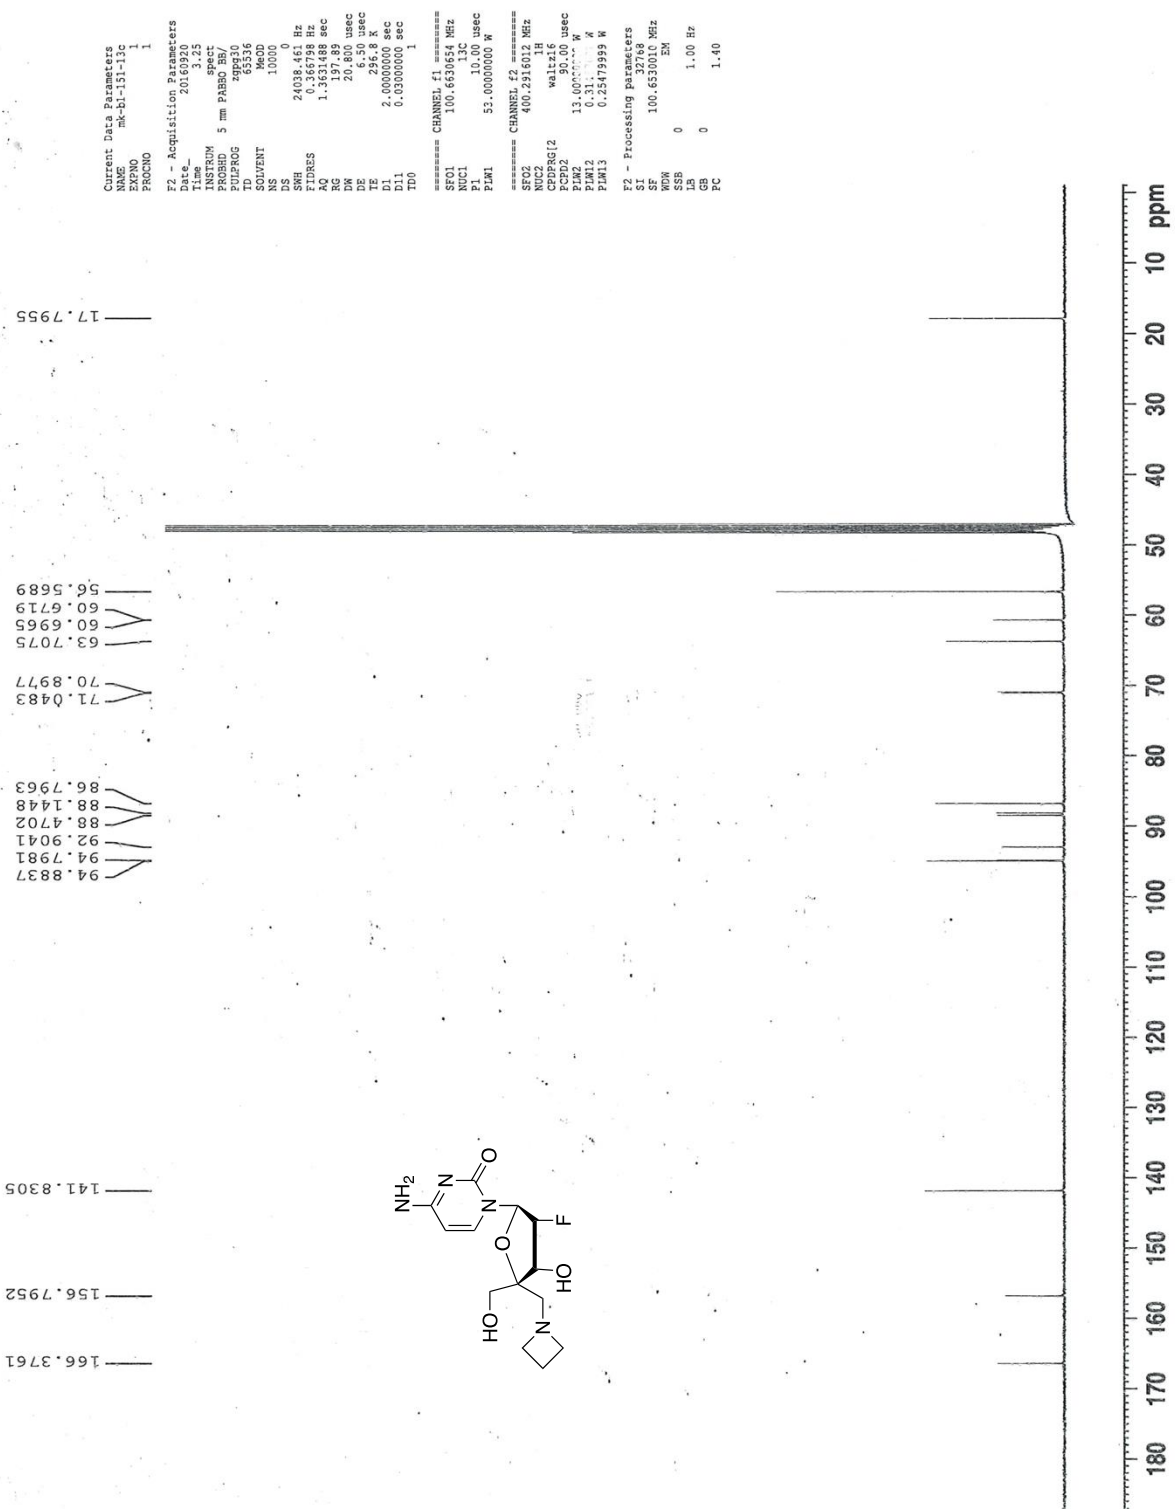

**Figure 5S.**  $^{13}\text{C}$ -NMR spectrum of 4-Amino-1-((2*R*,3*R*,4*R*,5*R*)-5-(azetidin-1-ylmethyl)-3-fluoro-4-hydroxy-5-(hydroxymethyl) tetrahydrofuran-2-yl)pyrimidin-2(1*H*)-one (**14**)

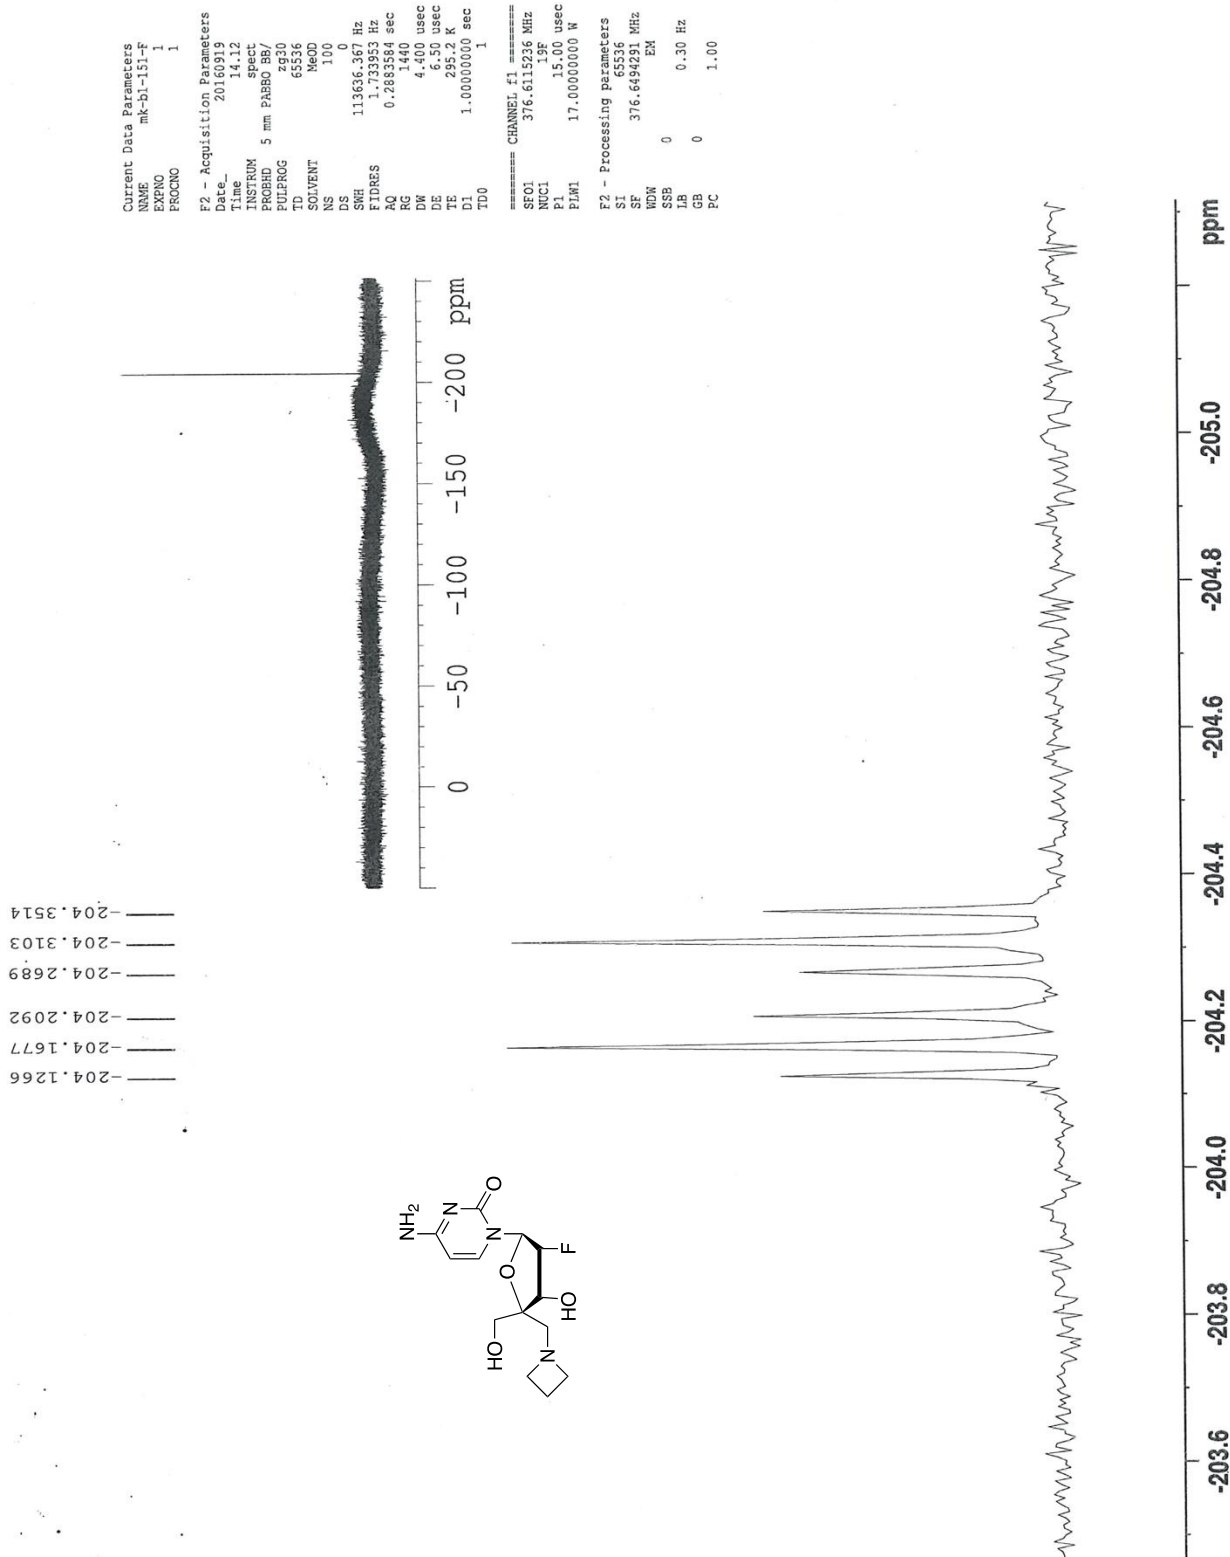

**Figure 6S.**  $^{19}\text{F}$ -NMR spectrum of 4-Amino-1-((2R,3R,4R,5R)-5-(azetidin-1-ylmethyl)-3-fluoro-4-hydroxy-5-(hydroxymethyl) tetrahydrofuran-2-yl)pyrimidin-2(1H)-one (**14**)

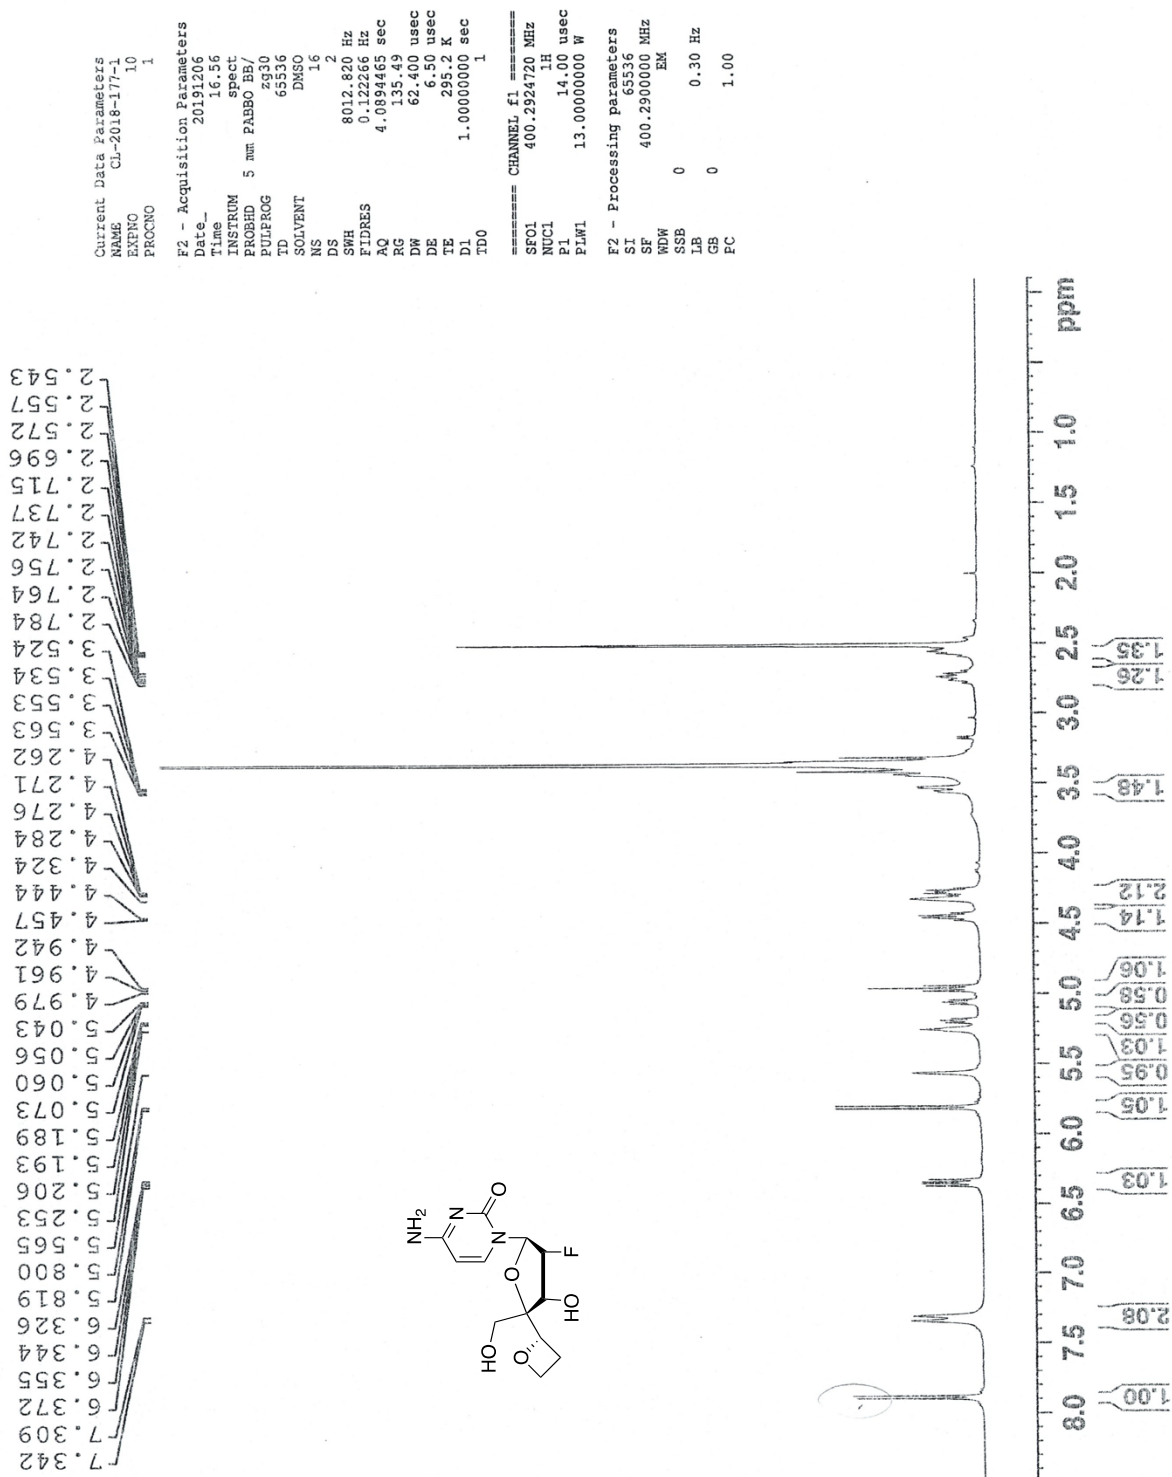

**Figure 7S.**  $^1\text{H-NMR}$  spectrum of 4-Amino-1-((2R,3R,4R,5R)-3-fluoro-4-hydroxy-5-(hydroxymethyl)-5-((S)-oxetan-2-yl) tetrahydrofuran-2-yl)pyrimidin-2(1H)-one (17)



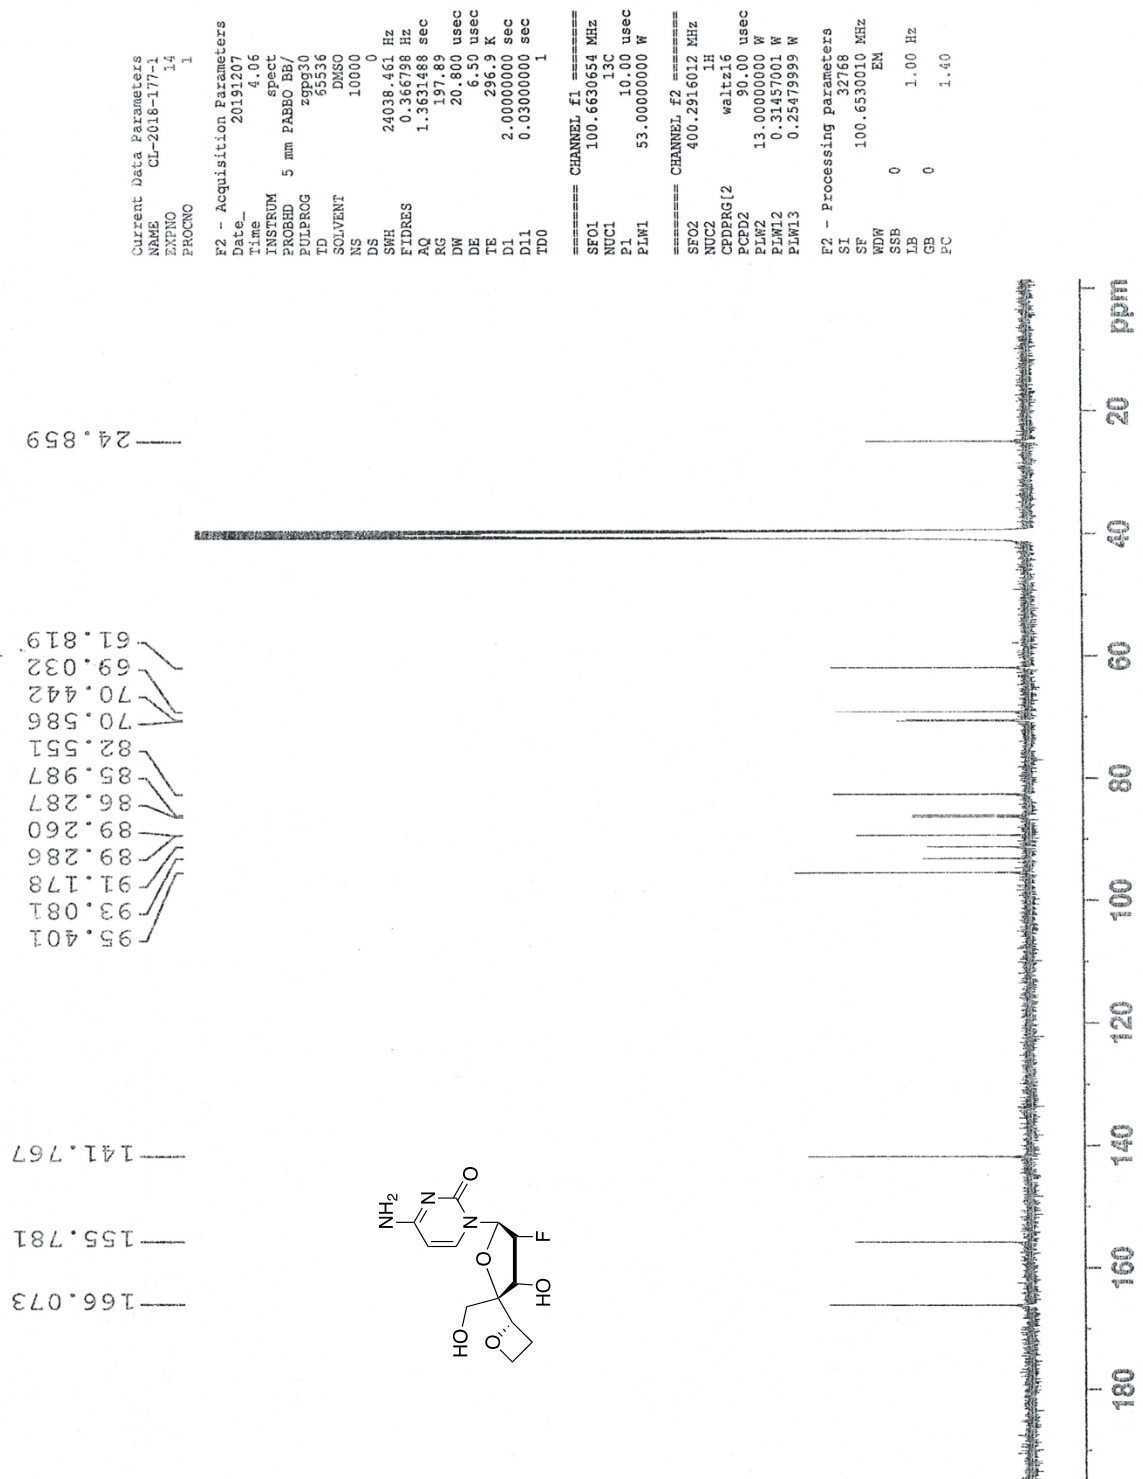

**Figure 8S.**  $^{13}\text{C}$ -NMR spectrum of 4-Amino-1-((2R,3R,4R,5R)-3-fluoro-4-hydroxy-5-(hydroxymethyl)-5-((S)-oxetan-2-yl) tetrahydrofuran-2-yl)pyrimidin-2(1H)-one (**17**)

-210.261  
 -210.270  
 -210.291  
 -210.300  
 -210.402  
 -210.411  
 -210.433  
 -210.441

```

Current Data Parameters
NAME      CL-2018-177-1
EXPNO     13
PROCNO    1

F2 - Acquisition Parameters
Date_     20191206
Time      17.04
INSTRUM   spect
PROBHD    5 mm PABBO BB/
PULPROG   zgpg30
TD         131072
SOLVENT   DMSO
NS         16
DS         4
SWH        89285.711 Hz
FIDRES     0.681196 Hz
AQ         0.7340032 sec
RG         491.38
DW         5.600 usec
DE         6.50 usec
TE         295.2 K
D1         1.00000000 sec
TD0        1

===== CHANNEL f1 =====
SFO1      376.6112517 MHz
NUC1       19F
P1         15.00 usec
PLW1      17.00000000 W

F2 - Processing parameters
SI         65536
SF         376.6489170 MHz
WDW        EM
SSB        0
LB         0.30 Hz
GB         0
PC         1.00
  
```

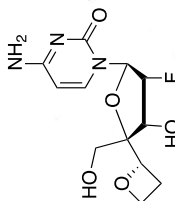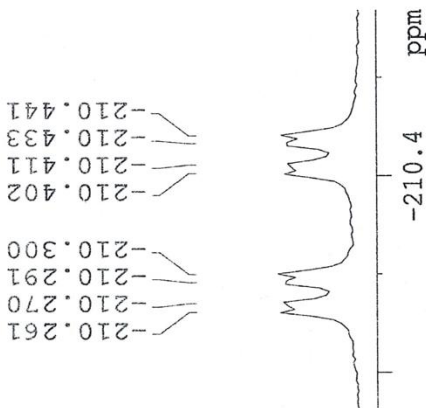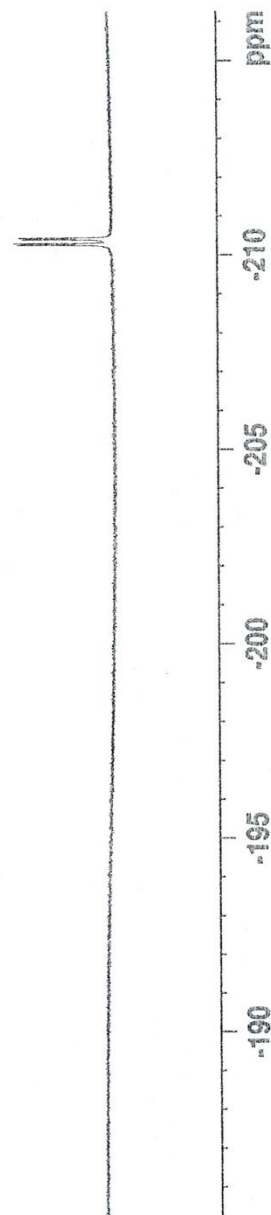

**Figure 9S.**  $^{19}\text{F}$ -NMR spectrum of 4-Amino-1-((2R,3R,4R,5R)-3-fluoro-4-hydroxy-5-(hydroxymethyl)-5-((S)-oxetan-2-yl) tetrahydrofuran-2-yl)pyrimidin-2(1H)-one (**17**)

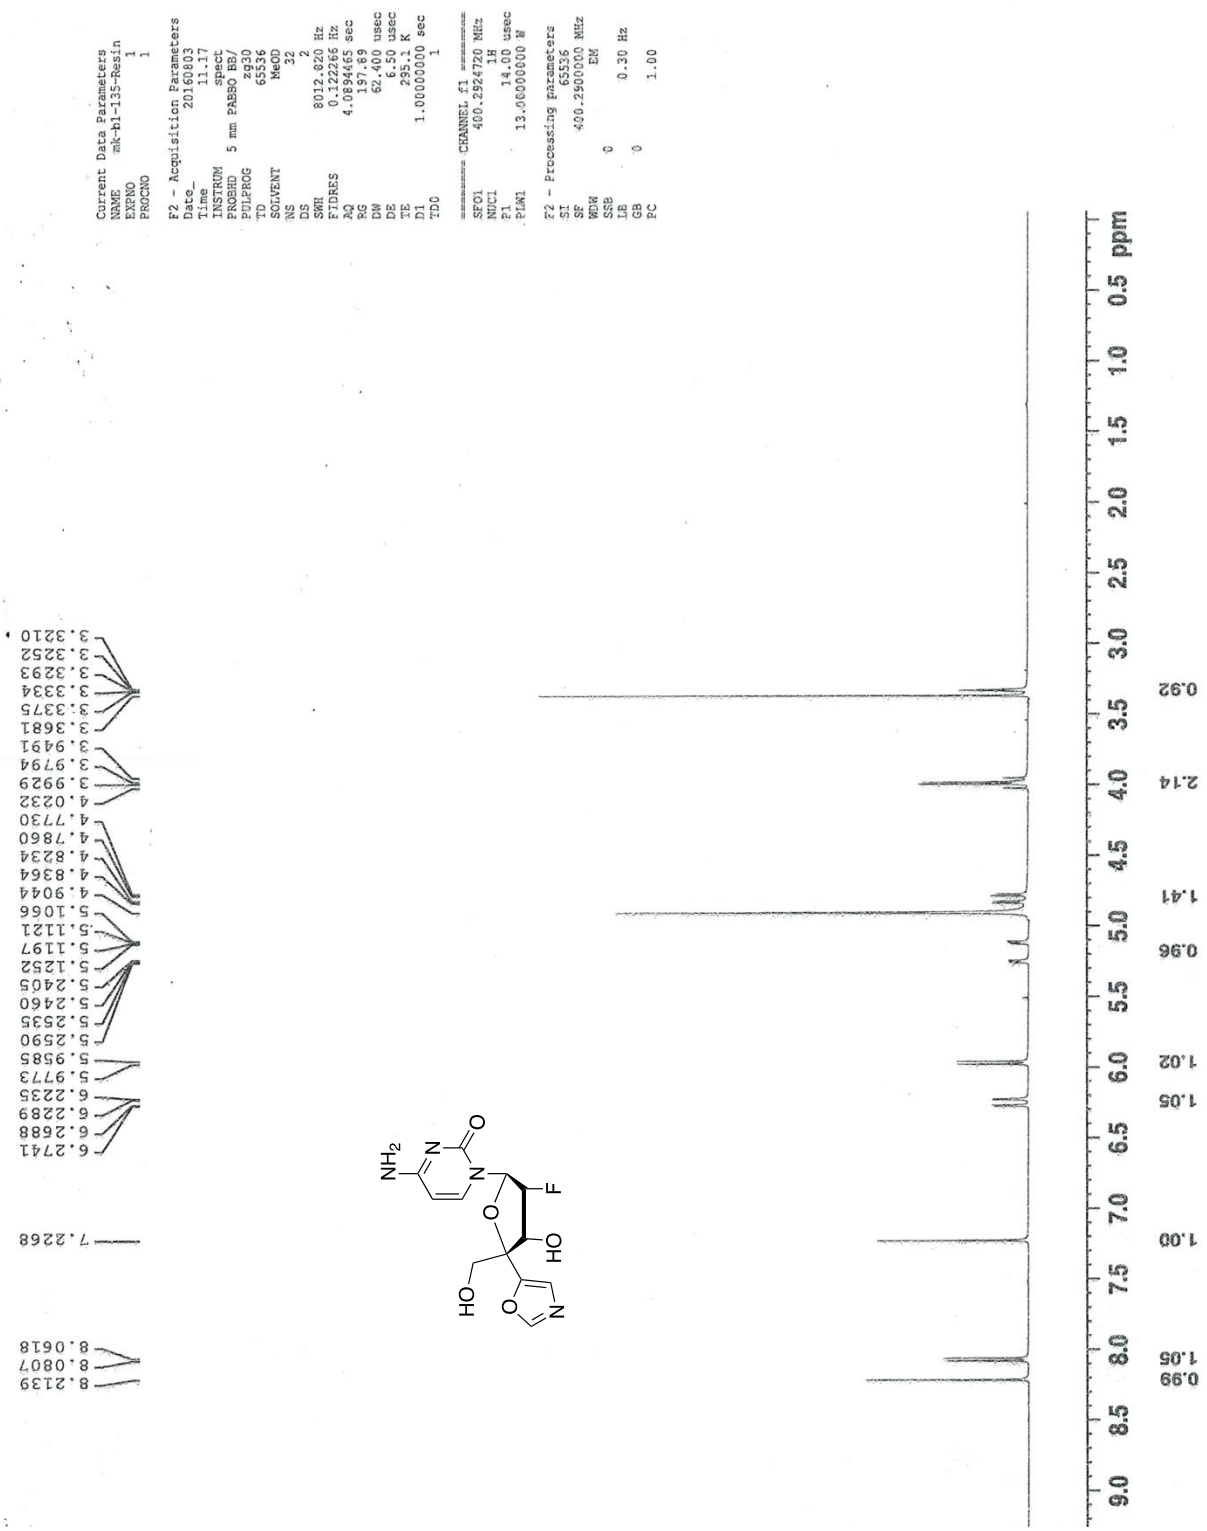

**Figure 10S.** <sup>1</sup>H-NMR spectrum of 4-Amino-1-((2R,3R,4R,5R)-3-fluoro-4-hydroxy-5-(hydroxymethyl)-5-(oxazol-5-yl)tetrahydrofuran-2-yl)pyrimidin-2(1H)-one (**20**)

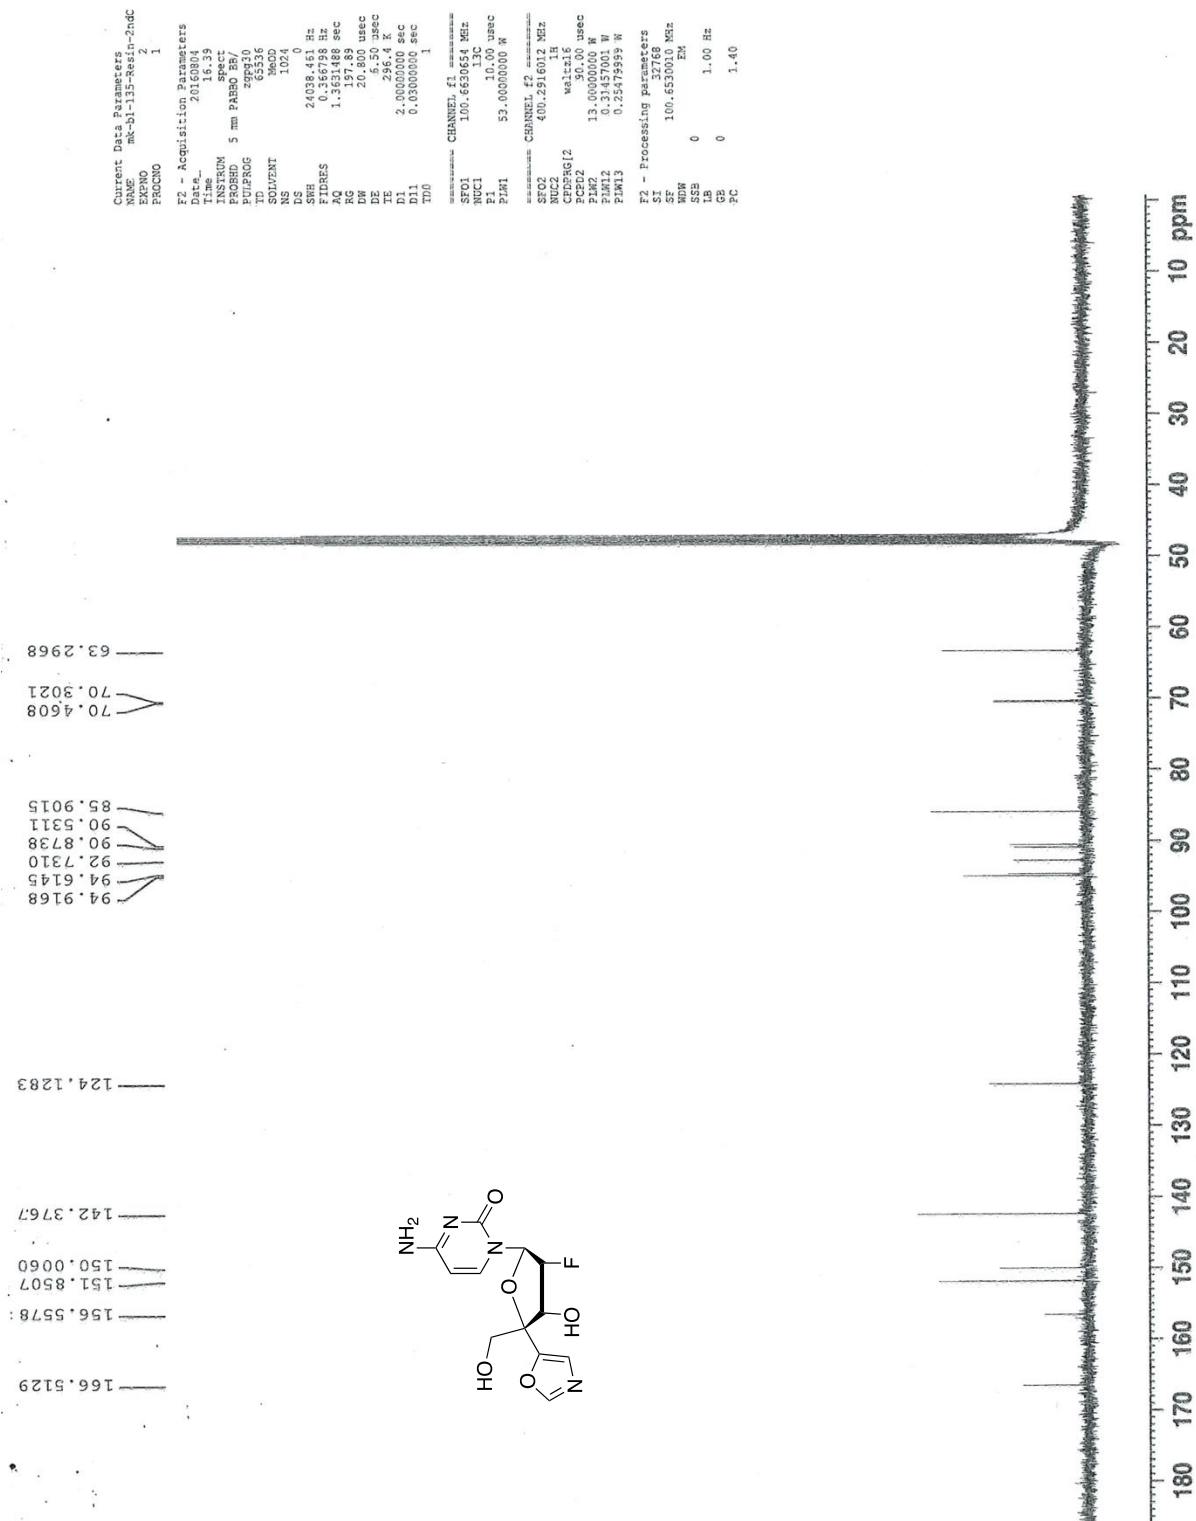

**Figure 11S.**  $^{13}\text{C}$ -NMR spectrum of 4-Amino-1-((2R,3R,4R,5R)-3-fluoro-4-hydroxy-5-(hydroxymethyl)-5-(oxazol-5-yl)tetrahydrofuran-2-yl)pyrimidin-2(1H)-one (**20**)

Current Data Parameters  
 NAME MKI-135-19F  
 EXPNO 10  
 PROCNO 1

F2 - Acquisition Parameters  
 Date\_ 20200107  
 Time\_ 23:33  
 INSTRUM spect  
 PROBHD 5 mm PABBO BB/  
 PULPROG zgpg30  
 ID 131072  
 SOLVENT MeOD  
 NS 10000  
 DS 4  
 SWH 89285.711 Hz  
 FIDRES 0.681136 Hz  
 AQ 0.7340032 sec  
 RG 548.76  
 DW 5.600 usec  
 DE 6.50 usec  
 TE 295.0 K  
 D1 1.00000000 sec  
 TDO 1

===== CHANNEL f1 =====  
 SF01 376.6112517 MHz  
 NUCL1 19F  
 FL 15.00 usec  
 PLW1 17.00000000 W

F2 - Processing parameters  
 SI 65536  
 SF 376.6489170 MHz  
 WDW EM  
 SSB 0  
 LB 0.30 Hz  
 GB 0  
 PC 1.00

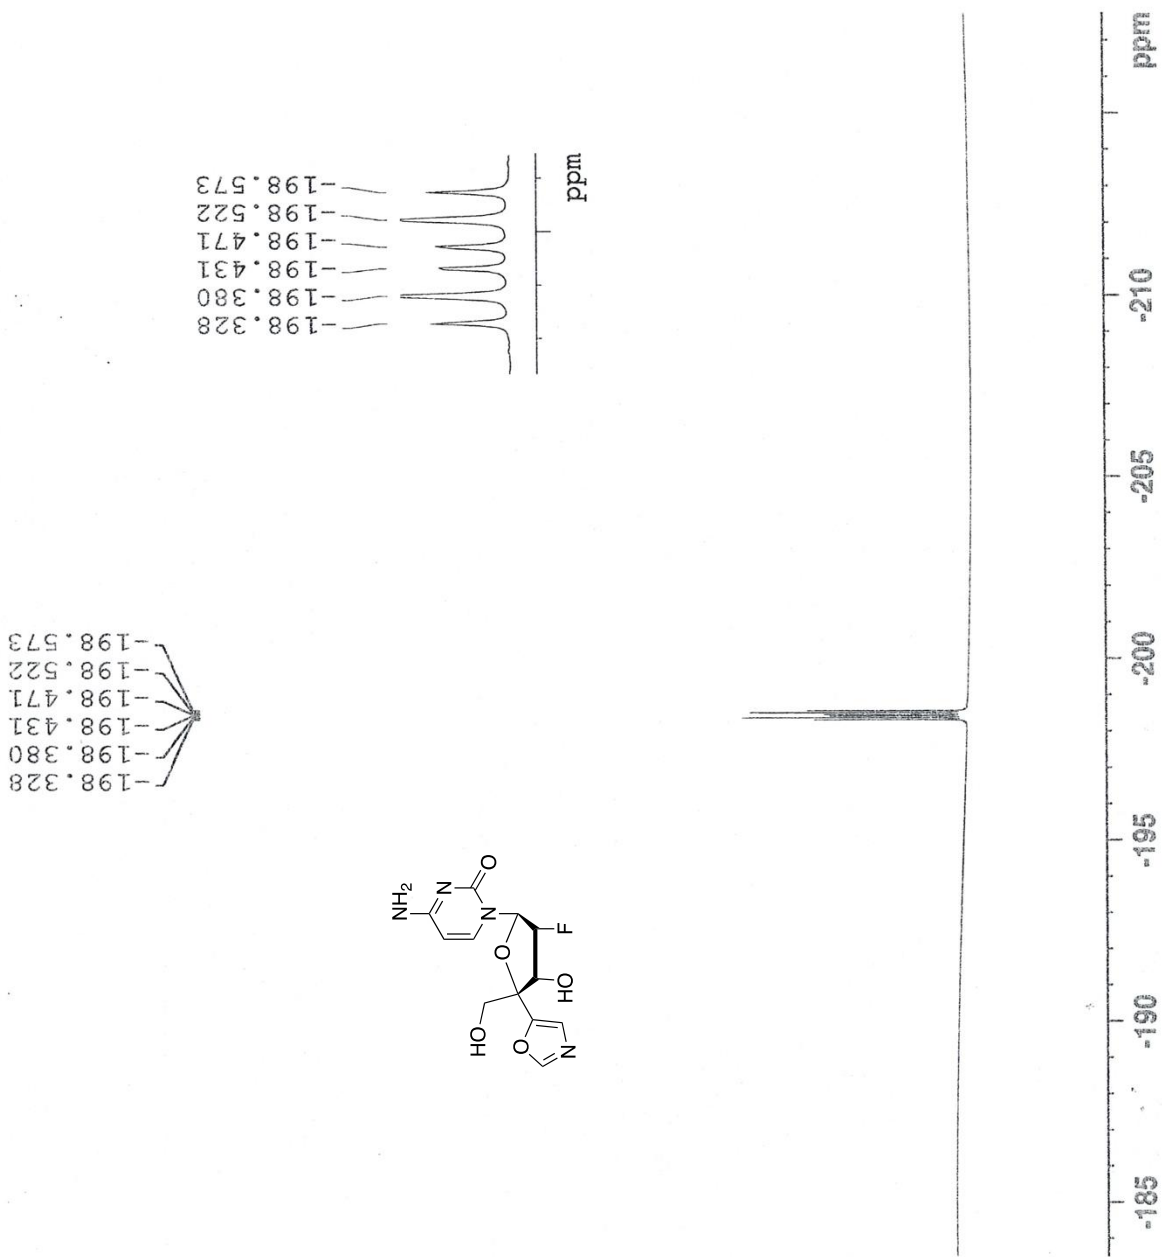

**Figure 12S.**  $^{19}\text{F}$ -NMR spectrum of 4-Amino-1-((2R,3R,4R,5R)-3-fluoro-4-hydroxy-5-(hydroxymethyl)-5-(oxazol-5-yl)tetrahydrofuran-2-yl)pyrimidin-2(1H)-one (**20**)

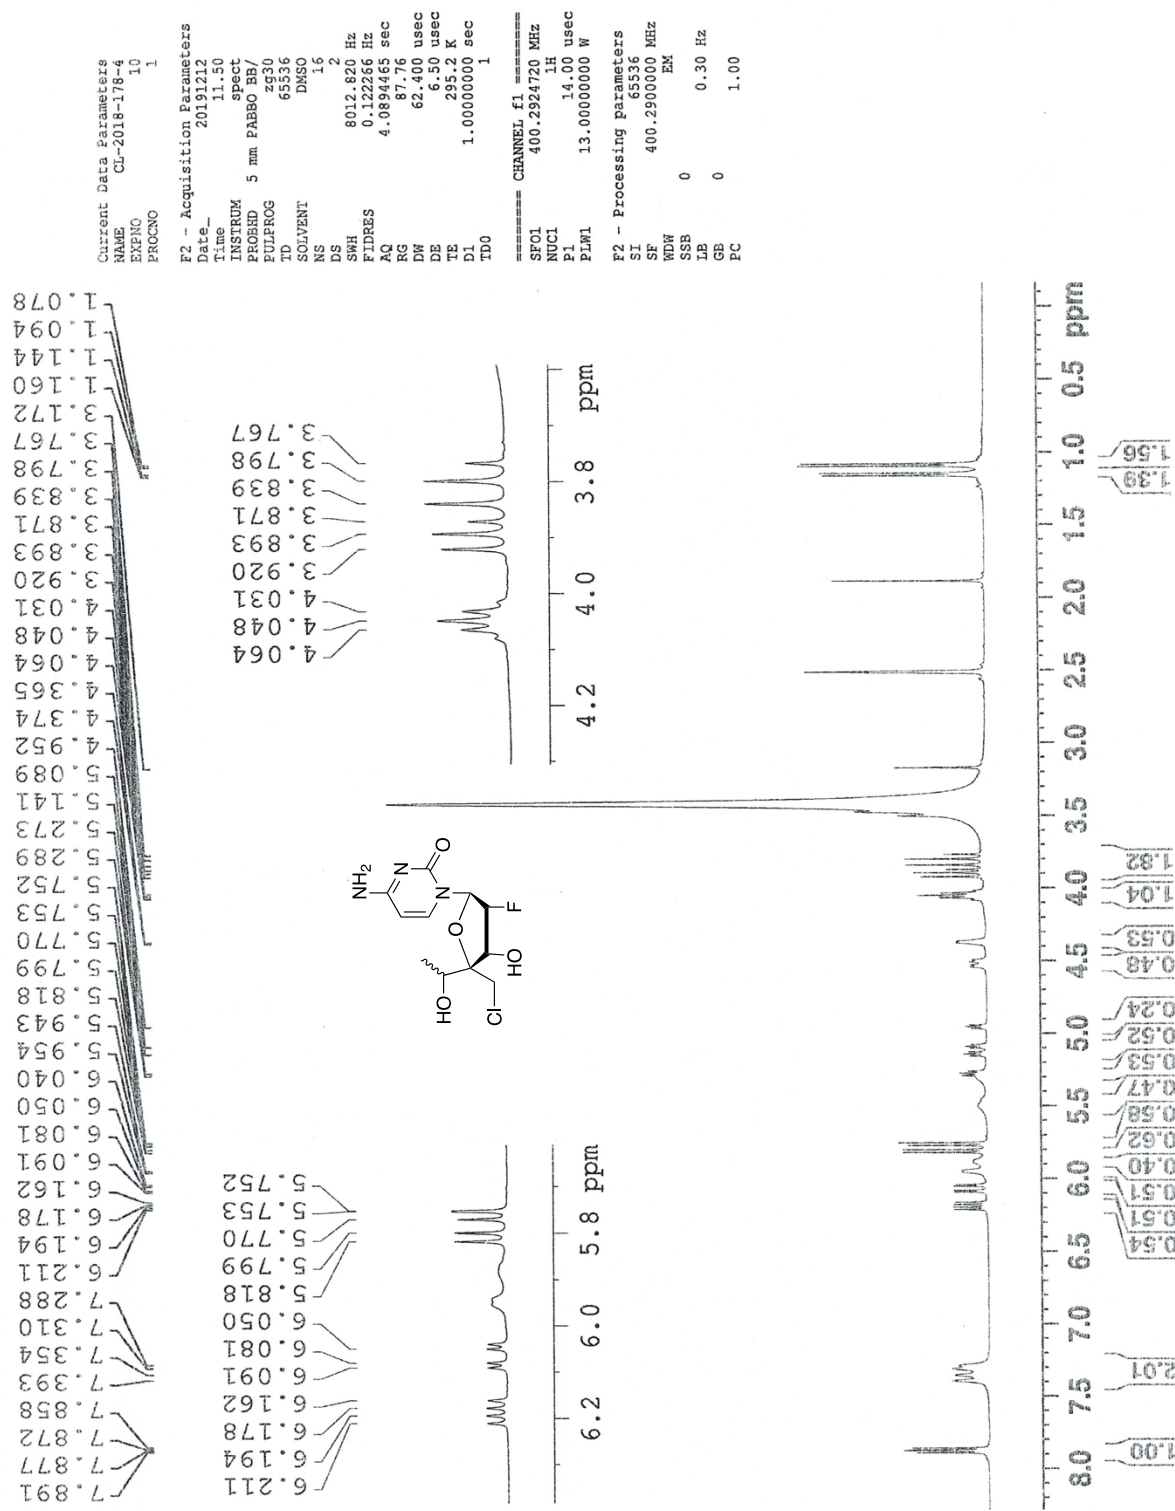

**Figure 13S.** <sup>1</sup>H-NMR spectrum of 4-Amino-1-((2R,3R,4R,5R)-5-(chloromethyl)-3-fluoro-4-hydroxy-5-(1-hydroxyethyl)tetrahydrofuran-2-yl)pyrimidin-2(1H)-one (25)

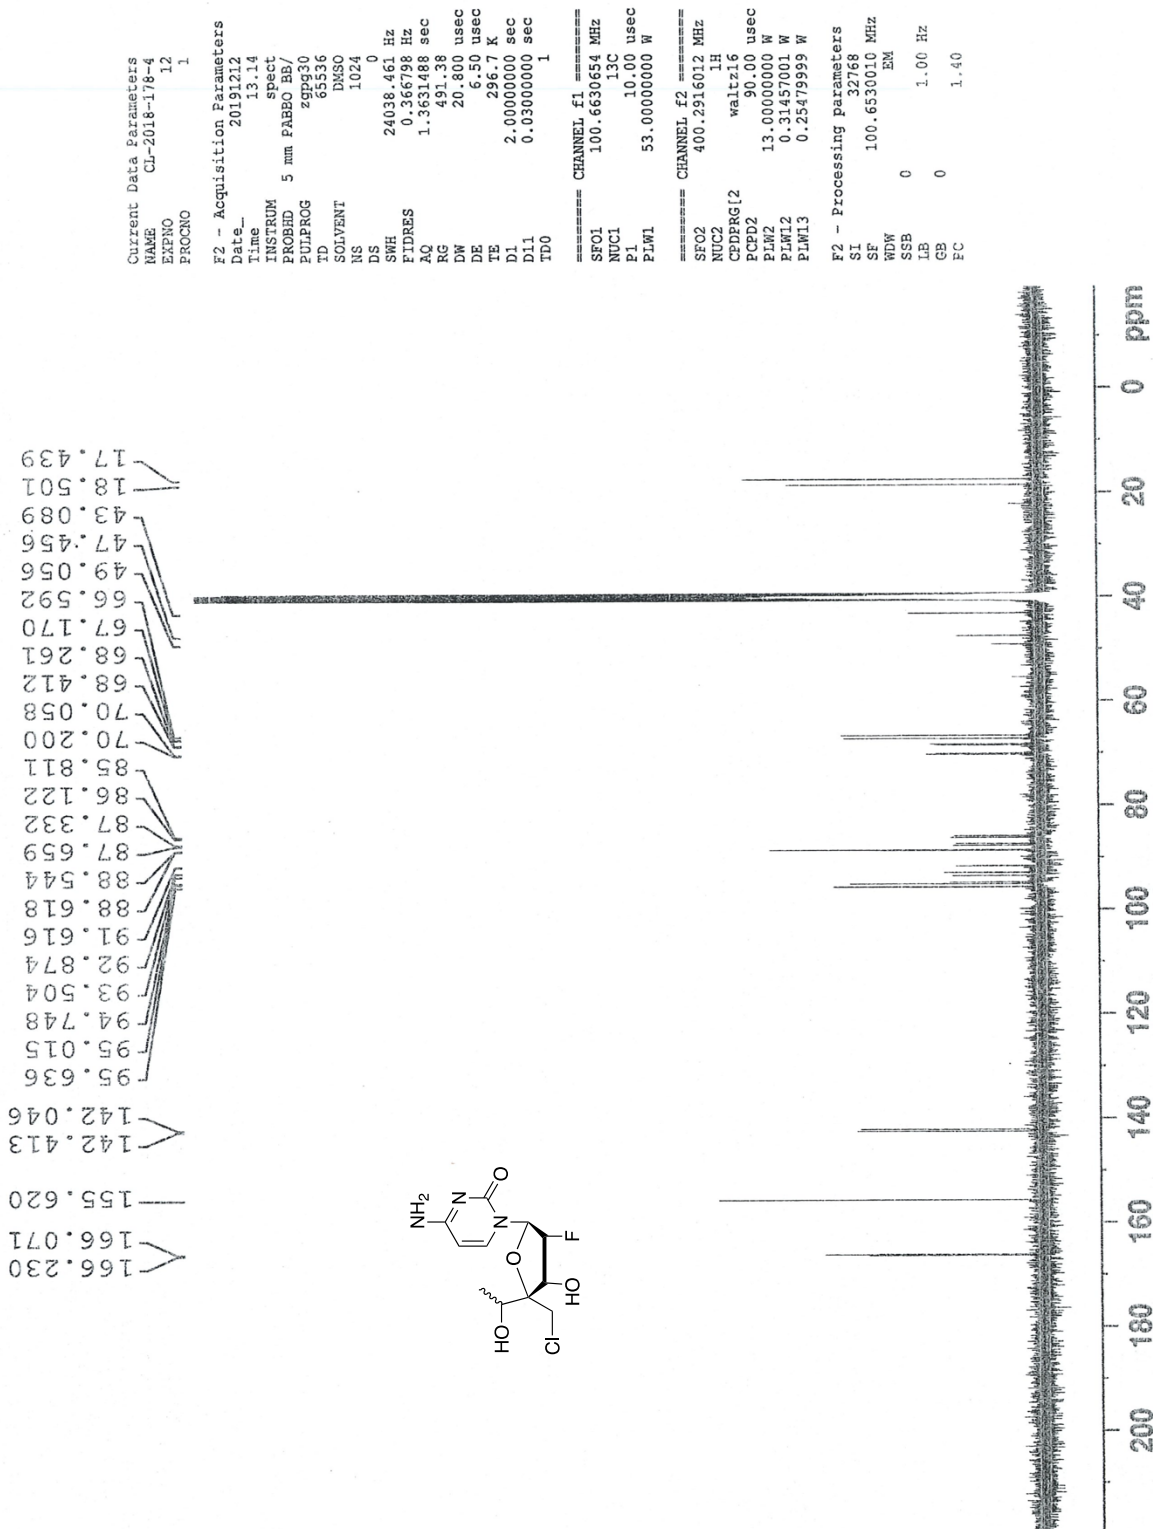

**Figure 14S.**  $^{13}\text{C}$ -NMR spectrum of 4-Amino-1-((2R,3R,4R,5R)-5-(chloromethyl)-3-fluoro-4-hydroxy-5-(1-hydroxyethyl)tetrahydrofuran-2-yl)pyrimidin-2(1H)-one (**25**)



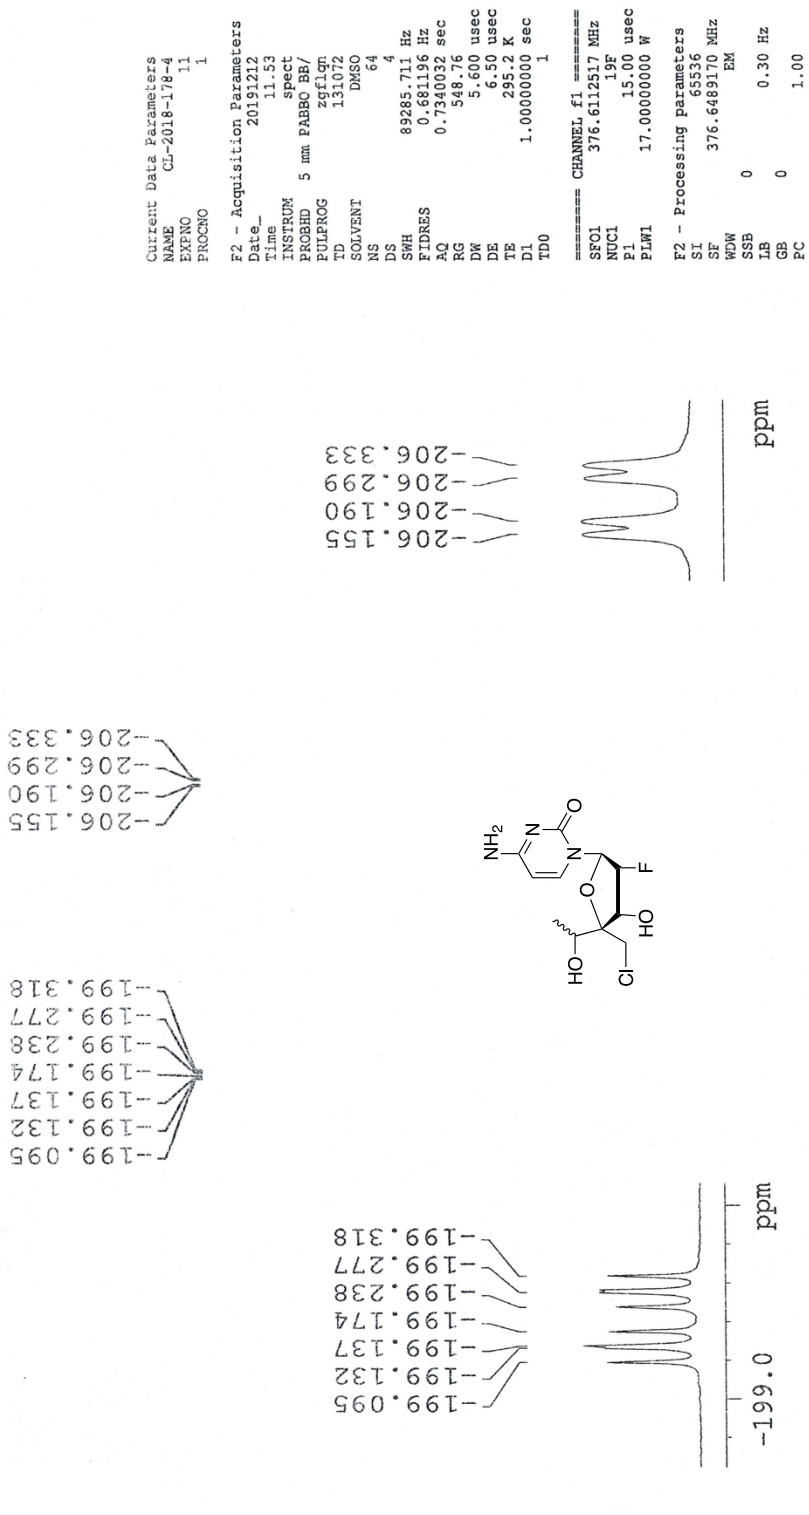

**Figure 15S.**  $^{19}\text{F}$ -NMR spectrum of 4-Amino-1-((2R,3R,4R,5R)-5-(chloromethyl)-3-fluoro-4-hydroxy-5-(1-hydroxyethyl)tetrahydrofuran-2-yl)pyrimidin-2(1H)-one (**25**)



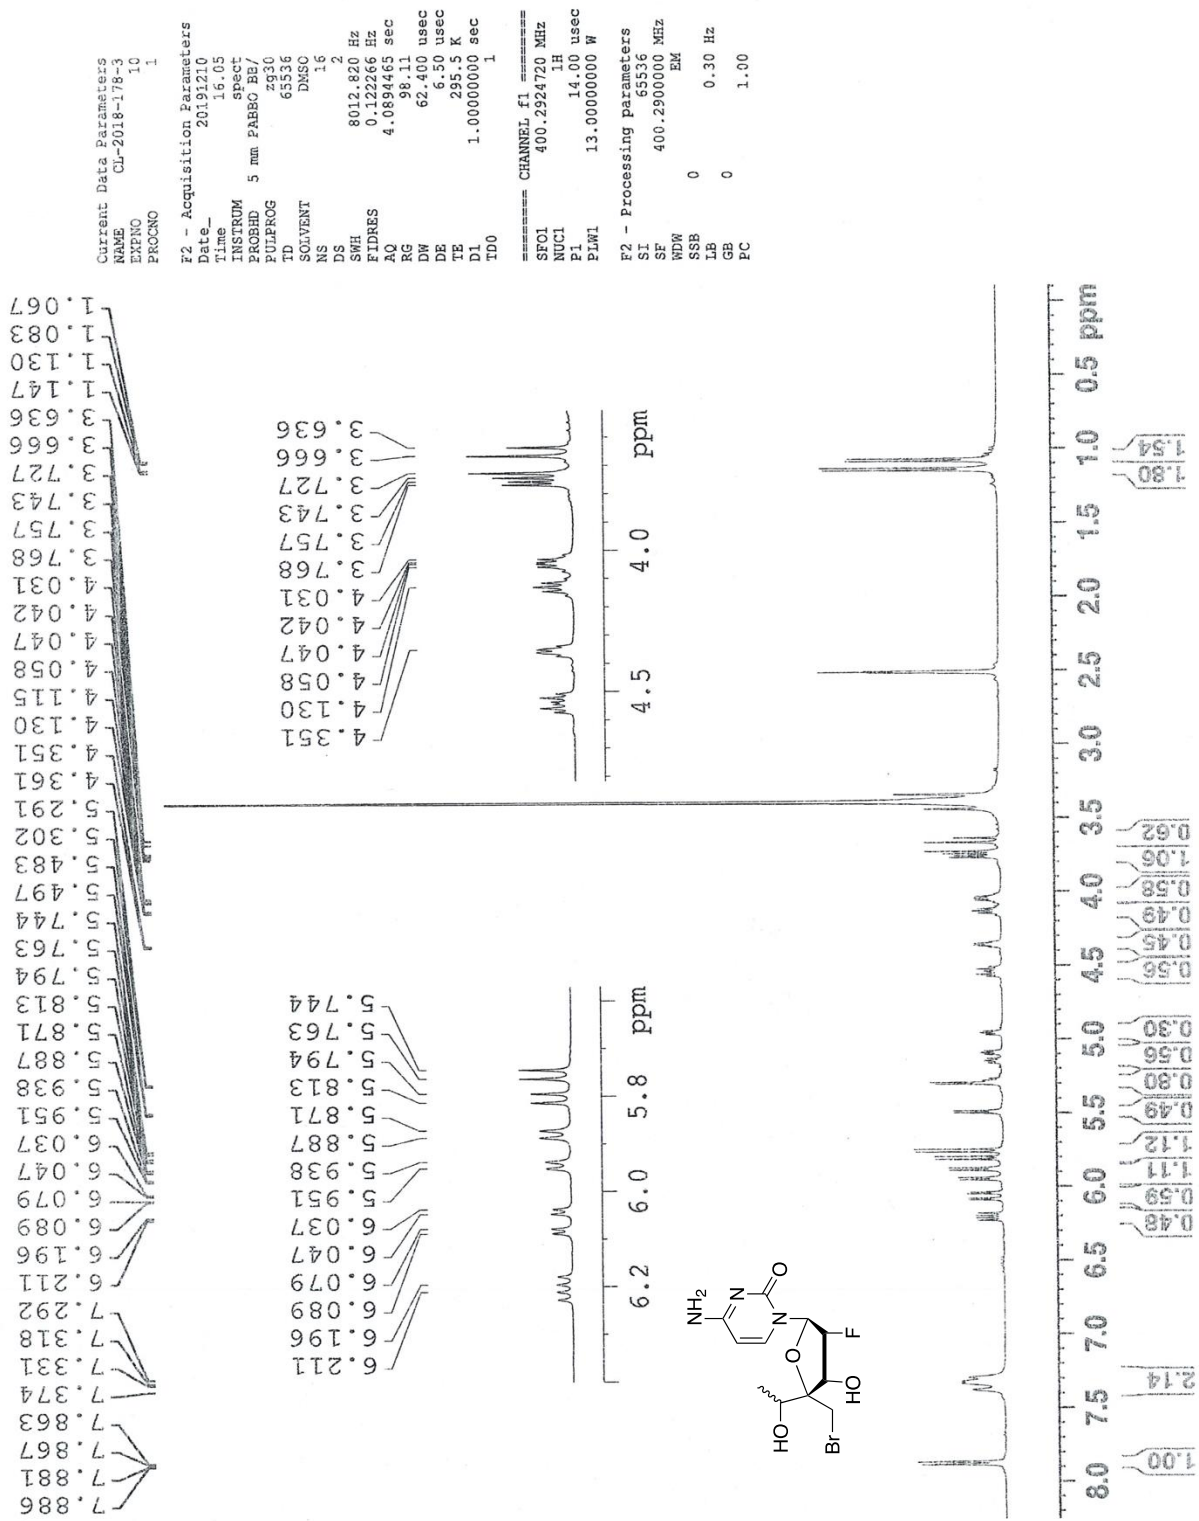

**Figure 16S.** <sup>1</sup>H-NMR spectrum of 4-Amino-1-((2R,3R,4R,5R)-5-(bromomethyl)-3-fluoro-4-hydroxy-5-(1-hydroxyethyl) tetrahydrofuran-2-yl)pyrimidin-2(1H)-one (26)

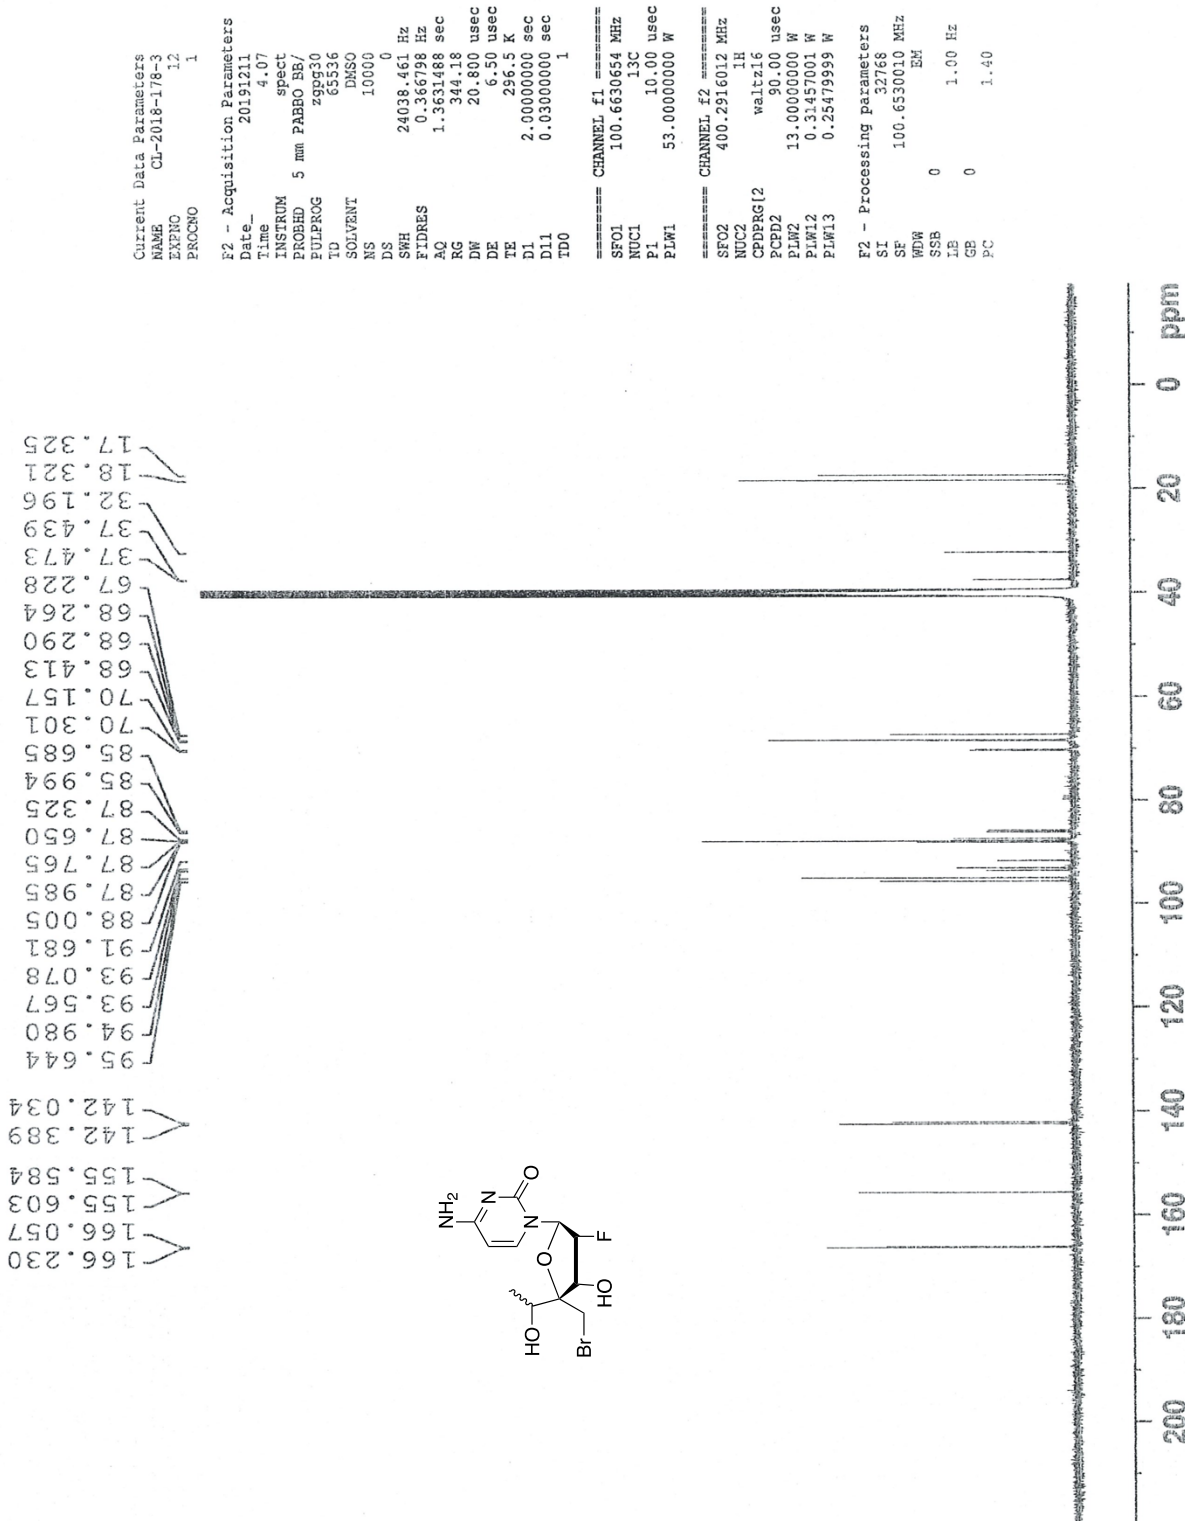

**Figure 17S.**  $^{13}\text{C}$ -NMR spectrum of 4-Amino-1-((2R,3R,4R,5R)-5-(bromomethyl)-3-fluoro-4-hydroxy-5-(1-hydroxyethyl) tetrahydrofuran-2-yl)pyrimidin-2(1H)-one (**26**)

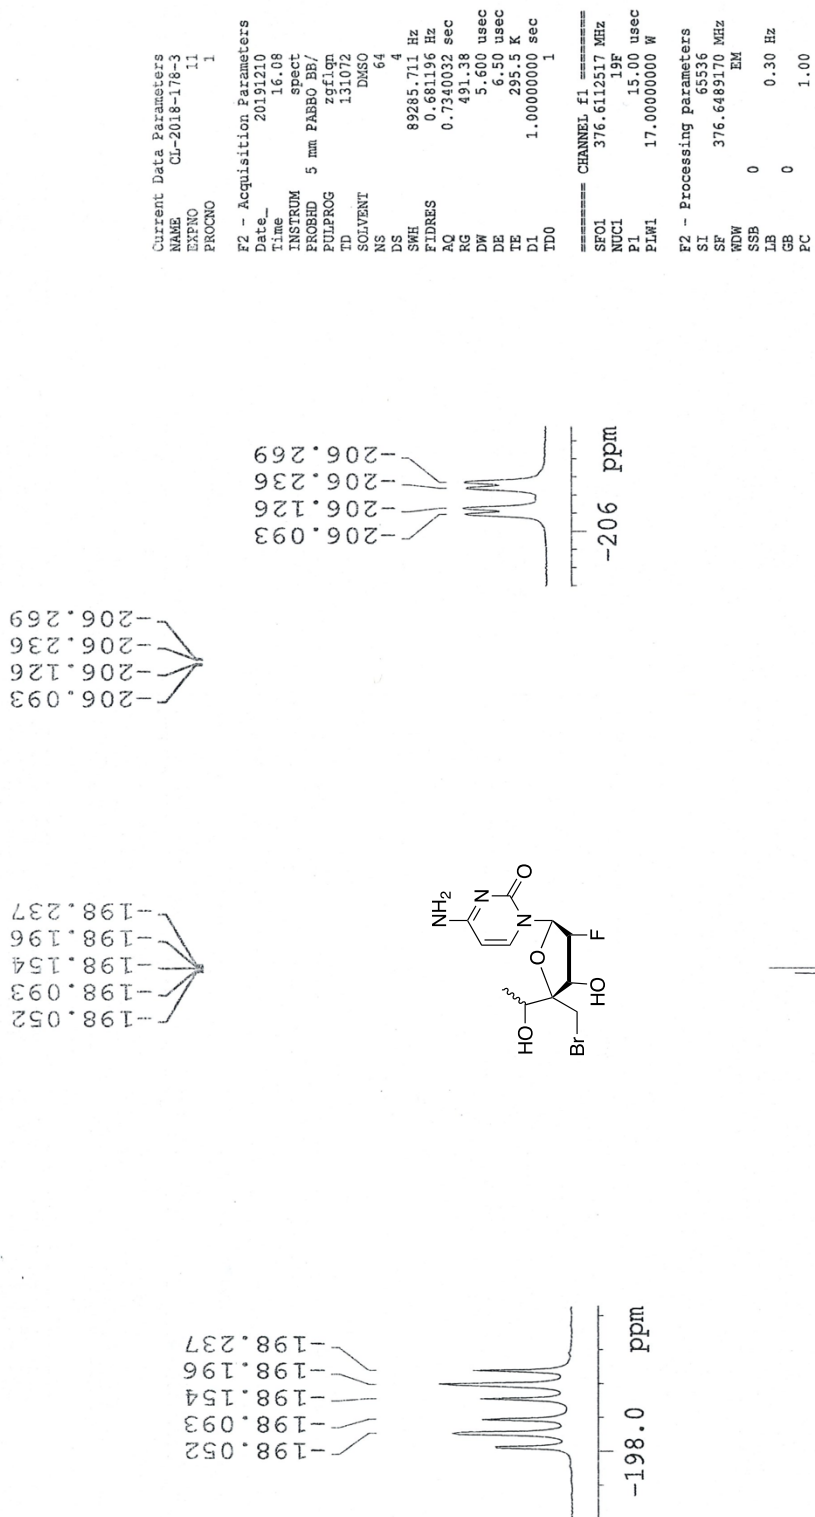

**Figure 18S.**  $^{19}\text{F}$ -NMR spectrum of 4-Amino-1-((2R,3R,4R,5R)-5-(bromomethyl)-3-fluoro-4-hydroxy-5-(1-hydroxyethyl) tetrahydrofuran-2-yl)pyrimidin-2(1H)-one (**26**)

## Crystal Data and Experimental

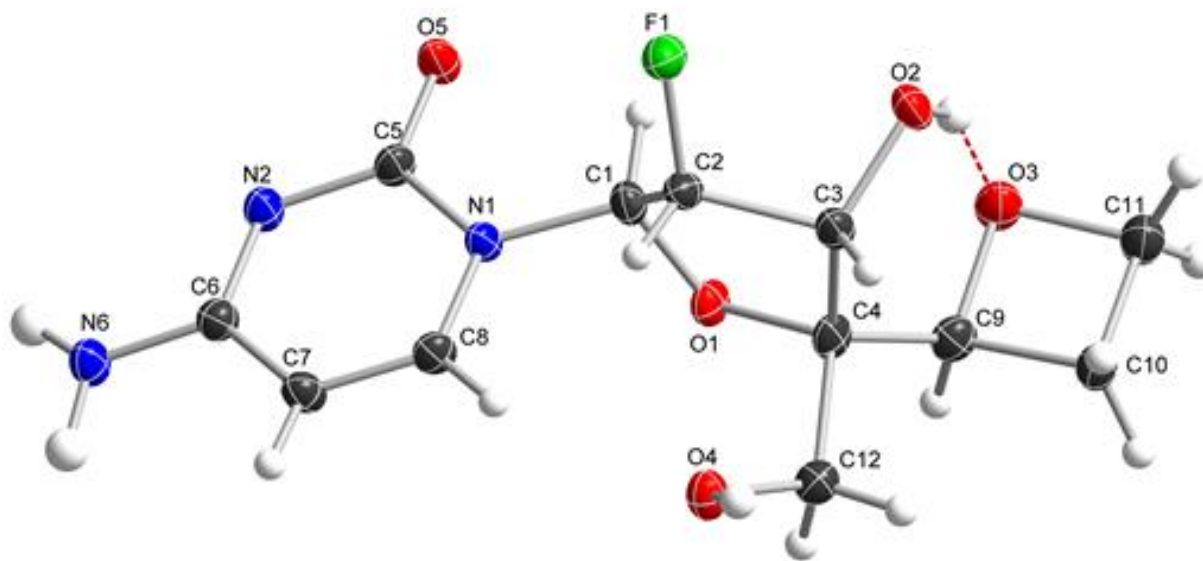

**Experimental.** Single colourless plate crystals of **17** were recrystallised from methanol by slow evaporation. A suitable crystal with dimensions  $0.41 \times 0.30 \times 0.15 \text{ mm}^3$  was selected and mounted on a loop with paratone oil on a XtaLAB Synergy-S diffractometer. The crystal was kept at a steady  $T = 99.9(4) \text{ K}$  during data collection. The structure was solved with the ShelXT (Sheldrick, 2015) solution program using dual-space recycling methods and by using **Olex2** (Dolomanov et al., 2009) as the graphical interface. The model was refined with ShelXL 2018/3 (Sheldrick, 2015) using full matrix least squares minimisation on  $F^2$ .

**Crystal Data.**  $\text{C}_{12}\text{H}_{16}\text{FN}_3\text{O}_5$ ,  $M_r = 301.28$ , orthorhombic,  $P2_12_12_1$  (No. 19),  $a = 7.3409(5) \text{ \AA}$ ,  $b = 8.2950(5) \text{ \AA}$ ,  $c = 19.9788(15) \text{ \AA}$ ,  $\alpha = \beta = \gamma = 90^\circ$ ,  $V = 1216.56(14) \text{ \AA}^3$ ,  $T = 99.9(4) \text{ K}$ ,  $Z = 4$ ,  $Z' = 1$ ,  $\mu(\text{Cu } K\alpha) = 1.192$ , 11534 reflections measured, 2161 unique ( $R_{int} = 0.0568$ ) which were used in all calculations. The final  $wR_2$  was 0.1111 (all data) and  $R_1$  was 0.0417 ( $I > 2\sigma(I)$ ).

|                                                |                                                                |
|------------------------------------------------|----------------------------------------------------------------|
| Formula                                        | C <sub>12</sub> H <sub>16</sub> FN <sub>3</sub> O <sub>5</sub> |
| <i>D</i> <sub>calc.</sub> / g cm <sup>-3</sup> | 1.645                                                          |
| $\mu$ /mm <sup>-1</sup>                        | 1.192                                                          |
| Formula Weight                                 | 301.28                                                         |
| Colour                                         | colourless                                                     |
| Shape                                          | plate                                                          |
| Size/mm <sup>3</sup>                           | 0.41×0.30×0.15                                                 |
| <i>T</i> /K                                    | 99.9(4)                                                        |
| Crystal System                                 | orthorhombic                                                   |
| Flack Parameter                                | -0.07(11)                                                      |
| Hoof Parameter                                 | -0.02(7)                                                       |
| Space Group                                    | <i>P</i> 2 <sub>1</sub> 2 <sub>1</sub> 2 <sub>1</sub>          |
| <i>a</i> /Å                                    | 7.3409(5)                                                      |
| <i>b</i> /Å                                    | 8.2950(5)                                                      |
| <i>c</i> /Å                                    | 19.9788(15)                                                    |
| $\alpha$ /°                                    | 90                                                             |
| $\beta$ /°                                     | 90                                                             |
| $\gamma$ /°                                    | 90                                                             |
| <i>V</i> /Å <sup>3</sup>                       | 1216.56(14)                                                    |
| <i>Z</i>                                       | 4                                                              |
| <i>Z</i> '                                     | 1                                                              |
| Wavelength/Å                                   | 1.54184                                                        |
| Radiation type                                 | Cu K $\alpha$                                                  |
| $\theta$ <sub>min</sub> /°                     | 4.426                                                          |
| $\theta$ <sub>max</sub> /°                     | 67.041                                                         |
| Measured Refl's.                               | 11534                                                          |
| Ind't Refl's                                   | 2161                                                           |
| Refl's with <i>I</i> > 2 $\sigma$ ( <i>I</i> ) | 2062                                                           |
| <i>R</i> <sub>int</sub>                        | 0.0568                                                         |
| Parameters                                     | 200                                                            |
| Restraints                                     | 3                                                              |
| Largest Peak                                   | 0.327                                                          |
| Deepest Hole                                   | -0.297                                                         |
| Goof                                           | 1.110                                                          |
| <i>wR</i> <sub>2</sub> (all data)              | 0.1111                                                         |
| <i>wR</i> <sub>2</sub>                         | 0.1027                                                         |
| <i>R</i> <sub>1</sub> (all data)               | 0.0440                                                         |
| <i>R</i> <sub>1</sub>                          | 0.0417                                                         |

**Table 1:** Fractional Atomic Coordinates ( $\times 10^4$ ) and Equivalent Isotropic Displacement Parameters ( $\text{\AA}^2 \times 10^3$ ) for **14**. *U*<sub>eq</sub> is defined as 1/3 of the trace of the orthogonalised *U*<sub>ij</sub>.

| Atom | x       | y       | z          | <i>U</i> <sub>eq</sub> |
|------|---------|---------|------------|------------------------|
| F1   | 7239(2) | 6456(2) | 5052.2(9)  | 23.2(4)                |
| O1   | 5729(3) | 6222(2) | 6712.2(10) | 19.6(5)                |
| O4   | 3222(3) | 8739(3) | 6290.8(11) | 21.6(5)                |
| O5   | 6151(3) | 2243(2) | 5962.2(12) | 23.1(5)                |
| O2   | 8980(3) | 8077(3) | 5972.9(12) | 22.5(5)                |
| O3   | 9245(3) | 7596(3) | 7277.5(11) | 25.7(5)                |
| N2   | 3107(4) | 1862(3) | 5818.5(13) | 19.4(6)                |
| N6   | 17(4)   | 1520(3) | 5690.6(14) | 21.5(6)                |

| Atom | x        | y       | z          | $U_{eq}$ |
|------|----------|---------|------------|----------|
| N1   | 4349(3)  | 4500(3) | 5921.3(13) | 17.0(6)  |
| C3   | 7049(4)  | 8250(3) | 6010.5(16) | 18.9(6)  |
| C8   | 2648(4)  | 5155(4) | 5819.4(15) | 18.9(6)  |
| C2   | 6151(4)  | 6946(3) | 5578.9(15) | 17.8(6)  |
| C5   | 4592(4)  | 2815(3) | 5897.3(15) | 18.7(7)  |
| C4   | 6204(4)  | 7937(3) | 6707.1(16) | 19.6(7)  |
| C6   | 1447(4)  | 2507(4) | 5736.9(15) | 18.9(6)  |
| C1   | 5915(4)  | 5541(3) | 6064.6(16) | 18.9(6)  |
| C7   | 1199(4)  | 4221(4) | 5708.1(16) | 19.8(7)  |
| C12  | 4468(4)  | 8905(4) | 6824.6(16) | 22.1(7)  |
| C9   | 7406(5)  | 8257(3) | 7309.8(16) | 21.4(7)  |
| C10  | 8151(5)  | 9979(4) | 7408.1(16) | 22.2(7)  |
| C11  | 10002(5) | 9172(4) | 7490.6(19) | 26.5(7)  |

**Table 2:** Anisotropic Displacement Parameters ( $\times 10^4$ ) for **14**. The anisotropic displacement factor exponent takes the form:  $-2\pi^2[h^2a^{*2} \times U_{11} + \dots + 2hka^* \times b^* \times U_{12}]$

| Atom | $U_{11}$ | $U_{22}$ | $U_{33}$ | $U_{23}$ | $U_{13}$ | $U_{12}$ |
|------|----------|----------|----------|----------|----------|----------|
| F1   | 24.7(10) | 20.1(8)  | 24.9(9)  | -2.5(7)  | 5.6(7)   | -3.8(7)  |
| O1   | 23.7(11) | 13.1(10) | 22.0(10) | 0.4(8)   | 2.4(9)   | -4.7(9)  |
| O4   | 22.4(11) | 17.1(11) | 25.3(11) | 1.3(9)   | -2.7(9)  | -2.0(9)  |
| O5   | 16.6(10) | 14.3(10) | 38.3(13) | -0.2(9)  | -1.7(9)  | 1.8(9)   |
| O2   | 14.7(10) | 23.0(11) | 29.8(12) | -1.0(9)  | 0.0(9)   | -3.1(8)  |
| O3   | 22.7(11) | 21.2(11) | 33.2(13) | -2.4(9)  | -4.2(10) | 3.5(9)   |
| N2   | 18.1(13) | 13.5(11) | 26.7(14) | 0.5(9)   | -1.6(11) | 0.0(9)   |
| N6   | 19.9(13) | 15.7(13) | 29.0(14) | 0.7(11)  | -0.3(11) | -2.1(11) |
| N1   | 14.4(12) | 11.6(11) | 25.1(13) | 0.2(9)   | 0.9(10)  | -0.5(9)  |
| C3   | 15.8(14) | 14.4(14) | 26.4(15) | -0.9(12) | -0.5(12) | 0.4(11)  |
| C8   | 19.6(15) | 13.7(12) | 23.5(15) | 1.5(11)  | 0.3(12)  | 2.0(12)  |
| C2   | 17.0(14) | 14.7(14) | 21.7(15) | -0.8(11) | 4.8(12)  | -2.0(11) |
| C5   | 18.9(14) | 12.7(13) | 24.4(16) | -0.6(11) | -0.7(12) | 1.8(11)  |
| C4   | 21.6(15) | 9.4(13)  | 27.7(16) | -0.5(11) | -0.7(13) | -0.5(11) |
| C6   | 19.0(14) | 17.1(15) | 20.6(15) | 0.4(12)  | 0.6(12)  | 0.0(12)  |
| C1   | 16.0(15) | 15.9(14) | 24.7(16) | -0.5(11) | -1.0(12) | -3.0(11) |
| C7   | 16.4(14) | 16.4(14) | 26.5(16) | 2.0(12)  | 1.8(12)  | 1.2(12)  |
| C12  | 22.5(16) | 20.6(15) | 23.1(16) | -2.8(12) | 0.1(12)  | 0.4(12)  |
| C9   | 23.7(16) | 15.8(14) | 24.6(16) | 0.4(12)  | 0.0(13)  | 1.9(12)  |
| C10  | 22.1(15) | 18.4(15) | 26.1(16) | -3.3(13) | -1.3(13) | -1.3(13) |
| C11  | 23.7(17) | 24.4(16) | 31.4(17) | -5.3(14) | -2.9(13) | -0.6(13) |

**Table 3:** Bond Lengths in Å for **14**.

| Atom | Atom | Length/Å |
|------|------|----------|
| F1   | C2   | 1.382(3) |
| O1   | C4   | 1.465(3) |
| O1   | C1   | 1.418(4) |
| O4   | C12  | 1.412(4) |
| O5   | C5   | 1.245(4) |
| O2   | C3   | 1.427(4) |
| O3   | C9   | 1.459(4) |
| O3   | C11  | 1.483(4) |
| N2   | C5   | 1.356(4) |
| N2   | C6   | 1.340(4) |

| Atom | Atom | Length/Å |
|------|------|----------|
| N6   | C6   | 1.335(4) |
| N1   | C8   | 1.377(4) |
| N1   | C5   | 1.410(4) |
| N1   | C1   | 1.466(4) |
| C3   | C2   | 1.533(4) |
| C3   | C4   | 1.546(4) |
| C8   | C7   | 1.335(4) |
| C2   | C1   | 1.526(4) |
| C4   | C12  | 1.524(4) |
| C4   | C9   | 1.516(4) |
| C6   | C7   | 1.434(4) |
| C9   | C10  | 1.543(4) |
| C10  | C11  | 1.524(5) |

**Table 4:** Bond Angles in ° for **14**.

| Atom | Atom | Atom | Angle/°  |
|------|------|------|----------|
| C1   | O1   | C4   | 111.0(2) |
| C9   | O3   | C11  | 90.2(2)  |
| C6   | N2   | C5   | 120.8(2) |
| C8   | N1   | C5   | 120.0(3) |
| C8   | N1   | C1   | 120.5(2) |
| C5   | N1   | C1   | 119.4(3) |
| O2   | C3   | C2   | 109.1(2) |
| O2   | C3   | C4   | 115.4(3) |
| C2   | C3   | C4   | 102.4(2) |
| C7   | C8   | N1   | 121.3(3) |
| F1   | C2   | C3   | 112.8(2) |
| F1   | C2   | C1   | 109.0(2) |
| C1   | C2   | C3   | 103.3(2) |
| O5   | C5   | N2   | 121.9(3) |
| O5   | C5   | N1   | 119.4(3) |
| N2   | C5   | N1   | 118.7(3) |
| O1   | C4   | C3   | 105.4(2) |
| O1   | C4   | C12  | 108.2(3) |
| O1   | C4   | C9   | 107.6(2) |
| C12  | C4   | C3   | 112.7(2) |
| C9   | C4   | C3   | 116.9(3) |
| C9   | C4   | C12  | 105.8(2) |
| N2   | C6   | C7   | 121.1(3) |
| N6   | C6   | N2   | 118.6(3) |
| N6   | C6   | C7   | 120.4(3) |
| O1   | C1   | N1   | 109.7(2) |
| O1   | C1   | C2   | 106.7(2) |
| N1   | C1   | C2   | 114.5(3) |
| C8   | C7   | C6   | 117.9(3) |
| O4   | C12  | C4   | 111.9(2) |
| O3   | C9   | C4   | 116.0(2) |
| O3   | C9   | C10  | 91.4(2)  |
| C4   | C9   | C10  | 118.0(3) |
| C11  | C10  | C9   | 85.6(2)  |
| O3   | C11  | C10  | 91.3(2)  |

**Table 5:** Torsion Angles in ° for 14.

| Atom | Atom | Atom | Atom | Angle/°   |
|------|------|------|------|-----------|
| F1   | C2   | C1   | O1   | 148.7(2)  |
| F1   | C2   | C1   | N1   | -89.8(3)  |
| O1   | C4   | C12  | O4   | -65.8(3)  |
| O1   | C4   | C9   | O3   | 71.2(3)   |
| O1   | C4   | C9   | C10  | 178.1(3)  |
| O2   | C3   | C2   | F1   | -27.8(3)  |
| O2   | C3   | C2   | C1   | 89.6(3)   |
| O2   | C3   | C4   | O1   | -91.7(3)  |
| O2   | C3   | C4   | C12  | 150.6(3)  |
| O2   | C3   | C4   | C9   | 27.8(3)   |
| O3   | C9   | C10  | C11  | -9.2(2)   |
| N2   | C6   | C7   | C8   | -5.3(5)   |
| N6   | C6   | C7   | C8   | 173.8(3)  |
| N1   | C8   | C7   | C6   | 3.6(5)    |
| C3   | C2   | C1   | O1   | 28.6(3)   |
| C3   | C2   | C1   | N1   | 150.1(3)  |
| C3   | C4   | C12  | O4   | 50.2(3)   |
| C3   | C4   | C9   | O3   | -47.1(3)  |
| C3   | C4   | C9   | C10  | 59.8(4)   |
| C8   | N1   | C5   | O5   | 177.0(3)  |
| C8   | N1   | C5   | N2   | -4.5(4)   |
| C8   | N1   | C1   | O1   | 69.7(3)   |
| C8   | N1   | C1   | C2   | -50.1(4)  |
| C2   | C3   | C4   | O1   | 26.7(3)   |
| C2   | C3   | C4   | C12  | -91.0(3)  |
| C2   | C3   | C4   | C9   | 146.2(3)  |
| C5   | N2   | C6   | N6   | -177.1(3) |
| C5   | N2   | C6   | C7   | 2.1(5)    |
| C5   | N1   | C8   | C7   | 1.1(5)    |
| C5   | N1   | C1   | O1   | -109.4(3) |
| C5   | N1   | C1   | C2   | 130.7(3)  |
| C4   | O1   | C1   | N1   | -136.4(2) |
| C4   | O1   | C1   | C2   | -11.9(3)  |
| C4   | C3   | C2   | F1   | -150.6(2) |
| C4   | C3   | C2   | C1   | -33.2(3)  |
| C4   | C9   | C10  | C11  | -129.8(3) |
| C6   | N2   | C5   | O5   | -178.7(3) |
| C6   | N2   | C5   | N1   | 2.7(4)    |
| C1   | O1   | C4   | C3   | -9.6(3)   |
| C1   | O1   | C4   | C12  | 111.1(3)  |
| C1   | O1   | C4   | C9   | -135.1(3) |
| C1   | N1   | C8   | C7   | -178.0(3) |
| C1   | N1   | C5   | O5   | -3.9(4)   |
| C1   | N1   | C5   | N2   | 174.7(3)  |
| C12  | C4   | C9   | O3   | -173.4(2) |
| C12  | C4   | C9   | C10  | -66.5(3)  |
| C9   | O3   | C11  | C10  | -9.6(2)   |
| C9   | C4   | C12  | O4   | 179.1(2)  |
| C9   | C10  | C11  | O3   | 9.1(2)    |



| Atom | Atom | Atom | Atom | Angle/°  |
|------|------|------|------|----------|
| C11  | O3   | C9   | C4   | 131.8(3) |
| C11  | O3   | C9   | C10  | 9.4(2)   |

**Table 6:** Hydrogen Fractional Atomic Coordinates ( $\times 10^4$ ) and Equivalent Isotropic Displacement Parameters ( $\text{\AA}^2 \times 10^3$ ) for **14**.  $U_{eq}$  is defined as 1/3 of the trace of the orthogonalised  $U_{ij}$ .

| Atom | x         | y        | z        | $U_{eq}$ |
|------|-----------|----------|----------|----------|
| H4   | 3229.14   | 9561.08  | 6063.12  | 32       |
| H2   | 9460.59   | 7821.02  | 6415.34  | 34       |
| H3   | 6692.04   | 9320.38  | 5849.73  | 23       |
| H8   | 2506.17   | 6268.4   | 5828.28  | 23       |
| H2A  | 4963.83   | 7314.86  | 5414.61  | 21       |
| H1   | 7023.34   | 4882.71  | 6055.29  | 23       |
| H7   | 64.68     | 4666.83  | 5614.87  | 24       |
| H12A | 3896.91   | 8544.15  | 7235.91  | 26       |
| H12B | 4779.02   | 10034.77 | 6877.6   | 26       |
| H9   | 6796.54   | 7890.23  | 7718.88  | 26       |
| H10A | 8049.97   | 10664.31 | 7016.47  | 27       |
| H10B | 7707.75   | 10518.37 | 7806.97  | 27       |
| H11A | 10923.27  | 9589.33  | 7188.78  | 32       |
| H11B | 10441.42  | 9174.4   | 7948.55  | 32       |
| H6A  | -1140(30) | 2010(50) | 5720(20) | 46(9)    |
| H6B  | 90(70)    | 397(14)  | 5750(20) | 46(9)    |
